# Supplementary material for: Comparative efficacy and safety of adjuvant nivolumab versus other treatments in adults with resected melanoma: a systematic literature review and network meta-analysis
Source: PubMed Central journal article supplement (PMC7784366; doi:10.1186/s12885-020-07538-1), 2021-01-05
Supplement: 12885_2020_7538_MOESM1_ESM.pdf [file 12885_2020_7538_MOESM1_ESM.pdf]

## **Appendix A: Systematic literature review details and results**

### **Methods**

The eligibility criteria for the SLR were defined in terms of the population, interventions, comparisons, outcomes, and study design (PICOS) structure outlined in **Table. A.1**.

**Table A.1.** A comprehensive systematic literature search of MEDLINE, EMBASE, and the Cochrane Central Register of Controlled Trials was conducted. The original searches were executed on October 12, 2017 with predefined search strategies and was updated on May 8, 2018 (see Table A.2 to Table A.7 for search strategy details). Additionally, manual searches of four conference proceedings were conducted: International Society for Quality of Life Research 2017, Society for Melanoma Research 2017, Society for Immunotherapy of Cancer 2017, and American Academy of Cancer Research 2015 to 2018.

Two investigators independently reviewed all abstracts and proceedings identified in the literature search. All studies identified as eligible during the abstract screening were screened at a full-text stage by the same two reviewers. At each stage, if any discrepancies occurred between the studies that the two investigators selected, a third investigator provided arbitration. The two investigators independently extracted data on patient and study characteristics including treatment regimen, method of administration, frequency of administration, duration of treatment, concomitant/background therapies, age, sex, race, disease stage, performance status, comorbidities, and prior treatment experience.

The following outcomes were extracted: overall survival (OS), recurrence-free survival or disease-free survival (RFS/DFS), distant metastasis-free survival (DMFS), global quality of life as measured by EORTC QLQ-C30, all-cause grade 3/4 adverse events (AEs), and discontinuations. Two reviewers independently extracted all data from the included studies and recorded it in a spreadsheet. A third reviewer checked all data extraction.

**Table A.1**

Study selection criteria to identify trials for the systematic literature review.

| Criteria      | Description                                                                                                                                                                                                                                                                                                                                                                                                                                                              |
|---------------|--------------------------------------------------------------------------------------------------------------------------------------------------------------------------------------------------------------------------------------------------------------------------------------------------------------------------------------------------------------------------------------------------------------------------------------------------------------------------|
| Population    | Adults (aged 18 years and older) with <ul style="list-style-type: none"> <li>• Non-metastatic stage III melanoma<sup>a</sup></li> <li>• Non-metastatic stage IV melanoma</li> </ul>                                                                                                                                                                                                                                                                                      |
| Interventions | Eligible interventions include adjuvant treatment (given after surgery) with one of the following <sup>b</sup> : <ul style="list-style-type: none"> <li>• Nivolumab</li> <li>• Ipilimumab</li> <li>• Pembrolizumab</li> <li>• Dabrafenib in combination with trametinib</li> <li>• All interferon alphas (including 2a, 2b, pegylated 2a or 2b, and high and low doses)</li> </ul>                                                                                       |
| Comparators   | Eligible comparators include the following: <ul style="list-style-type: none"> <li>• Any treatment listed as an eligible intervention</li> <li>• Placebo</li> <li>• Standard of care</li> <li>• Watchful waiting</li> </ul>                                                                                                                                                                                                                                              |
| Outcomes      | Studies must report at least one of the following outcomes at a time point of 12 months or later: <ul style="list-style-type: none"> <li>• Overall survival</li> <li>• Recurrence-free survival or disease-free survival</li> <li>• Distant metastasis-free survival</li> <li>• Adverse events grade 3/4</li> <li>• Overall discontinuations</li> <li>• Discontinuations due to adverse events</li> <li>• Global quality of life as measured by EORTC QLQ-C30</li> </ul> |
| Study design  | Only randomized controlled trials will be included                                                                                                                                                                                                                                                                                                                                                                                                                       |
| Language      | Only studies published in English will be included                                                                                                                                                                                                                                                                                                                                                                                                                       |

<sup>a</sup>Studies assessing combined stage II/III patients will be included in the SLR, validity of inclusion in analyses will be assessed in the feasibility assessment. <sup>b</sup>Patients with background therapy (such as chemotherapy) in combination with one of the interventions of interest are eligible. EORTC QLQ-C30: European Organisation for Research and Treatment of Cancer Core Quality of Life Questionnaire.

**Table A.2**

Search strategy for EMBASE (EMBASE 1974 to October 11, 2017; Search executed: October 12, 2017).

| No | Criteria     | Strings                                                                                                                                                                   | Hits    |
|----|--------------|---------------------------------------------------------------------------------------------------------------------------------------------------------------------------|---------|
| 1  | Population   | exp Skin Neoplasms/                                                                                                                                                       | 206,816 |
| 2  |              | exp melanoma/                                                                                                                                                             | 133,929 |
| 3  |              | ((Skin adj Neoplasm\$) or (Skin adj Cancer\$) or (Skin adj Tumour\$) or (Skin adj Carcinoma\$) or (Skin adj Adenocarcinoma\$) or (Skin adj Sarcoma\$) or Melanoma).ti,ab. | 147,990 |
| 4  |              | or/1-3                                                                                                                                                                    | 344,369 |
| 5  | Intervention | exp nivolumab/                                                                                                                                                            | 5395    |
| 6  |              | (nivolumab or Opdivo or MDX-1106 or MDX1106 or ONO-4538 or ONO4538 or BMS-936558 or BMS936558).ti,ab.                                                                     | 2753    |
| 7  |              | exp ipilimumab/                                                                                                                                                           | 7942    |
| 8  |              | (ipilimumab or Yervoy or CTLA-4 or CTLA4 or MDX-010 or MDX010 or MDX-101 or MDX101).ti,ab.                                                                                | 13,640  |
| 9  |              | exp pembrolizumab/                                                                                                                                                        | 4300    |
| 10 |              | (pembrolizumab or lambrolizumab or Keytruda or MK-3475 or MK3475).ti,ab.                                                                                                  | 2027    |
| 11 |              | exp trametinib/                                                                                                                                                           | 2716    |
| 12 |              | (trametinib or Mekinist or JTP-74057 or JTP74057 or GSK-1120212 or GSK1120212).ti,ab.                                                                                     | 1262    |
| 13 |              | exp dabrafenib/                                                                                                                                                           | 2538    |
| 14 |              | (dabrafenib or Tafinlar or GSK-2118436 or GSK2118436).ti,ab.                                                                                                              | 1171    |
| 15 |              | exp interferons/                                                                                                                                                          | 463,668 |
| 16 |              | (interferon alpha or interferon alpha or interferon\$).ti,ab.                                                                                                             | 176,346 |
| 17 |              | or/5-16                                                                                                                                                                   | 510355  |
| 18 | Study design | Clinical trial/                                                                                                                                                           | 957,375 |
| 19 |              | Randomized controlled trial/                                                                                                                                              | 476,396 |
| 20 |              | Controlled clinical trial/                                                                                                                                                | 450,873 |
| 21 |              | Multicenter study/                                                                                                                                                        | 167,819 |
| 22 |              | Phase 3 clinical trial/                                                                                                                                                   | 30,537  |
| 23 |              | Phase 4 clinical trial/                                                                                                                                                   | 2745    |
| 24 |              | Exp randomization/                                                                                                                                                        | 76,036  |
| 25 |              | Single blind procedure/                                                                                                                                                   | 29,845  |
| 26 |              | Double blind procedure/                                                                                                                                                   | 143,863 |
| 27 |              | Crossover procedure                                                                                                                                                       | 53,679  |

| No | Criteria          | Strings                                                                                                                                                                                                                                                                                                                                                                                                                                                                                                                                                                                                                                                                                                                                                                                                                                                                                                                                                                                                                                                                                                                                                                                                                                           | Hits      |
|----|-------------------|---------------------------------------------------------------------------------------------------------------------------------------------------------------------------------------------------------------------------------------------------------------------------------------------------------------------------------------------------------------------------------------------------------------------------------------------------------------------------------------------------------------------------------------------------------------------------------------------------------------------------------------------------------------------------------------------------------------------------------------------------------------------------------------------------------------------------------------------------------------------------------------------------------------------------------------------------------------------------------------------------------------------------------------------------------------------------------------------------------------------------------------------------------------------------------------------------------------------------------------------------|-----------|
| 28 |                   | Placebo/                                                                                                                                                                                                                                                                                                                                                                                                                                                                                                                                                                                                                                                                                                                                                                                                                                                                                                                                                                                                                                                                                                                                                                                                                                          | 315,178   |
| 29 |                   | Randomi?ed controlled trial\$.tw.                                                                                                                                                                                                                                                                                                                                                                                                                                                                                                                                                                                                                                                                                                                                                                                                                                                                                                                                                                                                                                                                                                                                                                                                                 | 169,116   |
| 30 |                   | Rct.tw.                                                                                                                                                                                                                                                                                                                                                                                                                                                                                                                                                                                                                                                                                                                                                                                                                                                                                                                                                                                                                                                                                                                                                                                                                                           | 25,996    |
| 31 |                   | (random\$ adj2 allocat\$).tw.                                                                                                                                                                                                                                                                                                                                                                                                                                                                                                                                                                                                                                                                                                                                                                                                                                                                                                                                                                                                                                                                                                                                                                                                                     | 35,330    |
| 32 |                   | Single blind\$.tw.                                                                                                                                                                                                                                                                                                                                                                                                                                                                                                                                                                                                                                                                                                                                                                                                                                                                                                                                                                                                                                                                                                                                                                                                                                | 20,242    |
| 33 |                   | Double blind\$.tw.                                                                                                                                                                                                                                                                                                                                                                                                                                                                                                                                                                                                                                                                                                                                                                                                                                                                                                                                                                                                                                                                                                                                                                                                                                | 183,557   |
| 34 |                   | ((treble or triple) adj blind\$).tw.                                                                                                                                                                                                                                                                                                                                                                                                                                                                                                                                                                                                                                                                                                                                                                                                                                                                                                                                                                                                                                                                                                                                                                                                              | 748       |
| 35 |                   | Placebo\$.tw.                                                                                                                                                                                                                                                                                                                                                                                                                                                                                                                                                                                                                                                                                                                                                                                                                                                                                                                                                                                                                                                                                                                                                                                                                                     | 263,368   |
| 36 |                   | Prospective study/                                                                                                                                                                                                                                                                                                                                                                                                                                                                                                                                                                                                                                                                                                                                                                                                                                                                                                                                                                                                                                                                                                                                                                                                                                | 407,734   |
| 37 |                   | or/18-36                                                                                                                                                                                                                                                                                                                                                                                                                                                                                                                                                                                                                                                                                                                                                                                                                                                                                                                                                                                                                                                                                                                                                                                                                                          | 1,896,300 |
| 38 |                   | Case study/                                                                                                                                                                                                                                                                                                                                                                                                                                                                                                                                                                                                                                                                                                                                                                                                                                                                                                                                                                                                                                                                                                                                                                                                                                       | 50,411    |
| 39 |                   | Case report.tw.                                                                                                                                                                                                                                                                                                                                                                                                                                                                                                                                                                                                                                                                                                                                                                                                                                                                                                                                                                                                                                                                                                                                                                                                                                   | 351,006   |
| 40 |                   | Abstract report/ or letter/                                                                                                                                                                                                                                                                                                                                                                                                                                                                                                                                                                                                                                                                                                                                                                                                                                                                                                                                                                                                                                                                                                                                                                                                                       | 1,036,903 |
| 41 |                   | Conference proceeding.pt.                                                                                                                                                                                                                                                                                                                                                                                                                                                                                                                                                                                                                                                                                                                                                                                                                                                                                                                                                                                                                                                                                                                                                                                                                         | 0         |
| 42 |                   | Conference abstract.pt.                                                                                                                                                                                                                                                                                                                                                                                                                                                                                                                                                                                                                                                                                                                                                                                                                                                                                                                                                                                                                                                                                                                                                                                                                           | 2,725,105 |
| 43 |                   | Editorial.pt.                                                                                                                                                                                                                                                                                                                                                                                                                                                                                                                                                                                                                                                                                                                                                                                                                                                                                                                                                                                                                                                                                                                                                                                                                                     | 549,558   |
| 44 |                   | Letter.pt.                                                                                                                                                                                                                                                                                                                                                                                                                                                                                                                                                                                                                                                                                                                                                                                                                                                                                                                                                                                                                                                                                                                                                                                                                                        | 994,139   |
| 45 |                   | Note.pt.                                                                                                                                                                                                                                                                                                                                                                                                                                                                                                                                                                                                                                                                                                                                                                                                                                                                                                                                                                                                                                                                                                                                                                                                                                          | 691,353   |
| 46 |                   | or/38-45                                                                                                                                                                                                                                                                                                                                                                                                                                                                                                                                                                                                                                                                                                                                                                                                                                                                                                                                                                                                                                                                                                                                                                                                                                          | 5,364,560 |
| 47 |                   | 37 not 46                                                                                                                                                                                                                                                                                                                                                                                                                                                                                                                                                                                                                                                                                                                                                                                                                                                                                                                                                                                                                                                                                                                                                                                                                                         | 1,509,652 |
| 48 | Combined criteria | 4 and 17 and 47                                                                                                                                                                                                                                                                                                                                                                                                                                                                                                                                                                                                                                                                                                                                                                                                                                                                                                                                                                                                                                                                                                                                                                                                                                   | 4556      |
| 49 |                   | 48 not (conference abstract or review or letter or meta-analysis or case report or case series or posters or News or Newspaper article or meeting abstracts or lectures or interview or historical article or handbooks or guidelines or guidebooks or essays or editorial or database or comment or clinical conference or catalogs or case reports or Short Survey or Note or Erratum or Chapter or book series or book or Conference Paper or Conference Proceeding: Article or Conference Proceeding: Conference Paper or Conference Proceeding: Editorial or Conference Proceeding: Note or Conference Proceeding: Review or Journal: Book or Journal: Conference Abstract or Journal: Conference Paper or Journal: Conference Review or Journal: Editorial or Journal: Erratum or Journal: Letter or Journal: Note or Journal: Patent or Journal: Press Release or Journal: Review or Journal: Short Survey or Report or Report: Article or Report: Editorial or Report: Letter or Report: Review or Trade Journal: Conference Paper or Trade Journal: Conference Review or Trade Journal: Editorial or Trade Journal: Erratum or Trade Journal: Note or Trade Journal: Letter or Trade Journal: Review or Trade Journal: Short Survey).pt. | 2048      |
| 50 | Limits            | limit 49 to english language                                                                                                                                                                                                                                                                                                                                                                                                                                                                                                                                                                                                                                                                                                                                                                                                                                                                                                                                                                                                                                                                                                                                                                                                                      | 1941      |

**Table A.3**

Search strategy for MEDLINE (Ovid MEDLINE(R) In-Process & Other Non-Indexed Citations, Ovid MEDLINE(R) Daily and Ovid MEDLINE(R) 1946 to Present; Search executed: October 12, 2017)

| No. | Criteria                        | Strings                                                                                                                                                                   | Hits                                   |         |
|-----|---------------------------------|---------------------------------------------------------------------------------------------------------------------------------------------------------------------------|----------------------------------------|---------|
| 1   | Population                      | exp Skin Neoplasms/                                                                                                                                                       | 118,146                                |         |
| 2   |                                 | exp melanoma/                                                                                                                                                             | 90,257                                 |         |
| 3   |                                 | ((Skin adj Neoplasm\$) or (Skin adj Cancer\$) or (Skin adj Tumour\$) or (Skin adj Carcinoma\$) or (Skin adj Adenocarcinoma\$) or (Skin adj Sarcoma\$) or Melanoma).ti,ab. | 116,512                                |         |
| 4   |                                 | or/1-3                                                                                                                                                                    | 207,599                                |         |
| 5   | Intervention                    | (nivolumab or Opdivo or MDX-1106 or MDX1106 or ONO-4538 or ONO4538 or BMS-936558 or BMS936558).ti,ab.                                                                     | 1411                                   |         |
| 6   |                                 | (ipilimumab or Yervoy or CTLA-4 or CTLA4 or MDX-010 or MDX010 or MDX-101 or MDX101).ti,ab.                                                                                | 8639                                   |         |
| 7   |                                 | (pembrolizumab or lambrolizumab or Keytruda or MK-3475 or MK3475).ti,ab.                                                                                                  | 933                                    |         |
| 8   |                                 | (dabrafenib or Tafinlar or GSK-2118436 or GSK2118436).ti,ab.                                                                                                              | 635                                    |         |
| 9   |                                 | (trametinib or Mekinist or JTP-74057 or JTP74057 or GSK-1120212 or GSK1120212).ti,ab.                                                                                     | 626                                    |         |
| 10  |                                 | exp interferons/                                                                                                                                                          | 132,389                                |         |
| 11  |                                 | (interferon alpha or interferon alpha or interferon\$).ti,ab.                                                                                                             | 145,756                                |         |
| 12  |                                 | or/5-11                                                                                                                                                                   | 198,811                                |         |
| 13  |                                 | Study design                                                                                                                                                              | Randomized Controlled Trials as Topic/ | 121,739 |
| 14  |                                 |                                                                                                                                                                           | randomized controlled trial/           | 496,708 |
| 15  | random Allocation/              |                                                                                                                                                                           | 99,603                                 |         |
| 16  | double Blind Method/            |                                                                                                                                                                           | 157,447                                |         |
| 17  | single Blind Method/            |                                                                                                                                                                           | 26,552                                 |         |
| 18  | clinical trial/                 |                                                                                                                                                                           | 547,944                                |         |
| 19  | clinical trial, phase i.pt.     |                                                                                                                                                                           | 19,999                                 |         |
| 20  | clinical trial, phase ii.pt.    |                                                                                                                                                                           | 32,245                                 |         |
| 21  | clinical trial, phase iii.pt.   |                                                                                                                                                                           | 15,264                                 |         |
| 22  | clinical trial, phase iv.pt.    |                                                                                                                                                                           | 1626                                   |         |
| 23  | controlled clinical trial.pt.   |                                                                                                                                                                           | 99,243                                 |         |
| 24  | randomized controlled trial.pt. |                                                                                                                                                                           | 496,708                                |         |

| No. | Criteria          | Strings                                                                   | Hits      |
|-----|-------------------|---------------------------------------------------------------------------|-----------|
| 25  |                   | multicenter study.pt.                                                     | 248,785   |
| 26  |                   | clinical trial.pt.                                                        | 547,944   |
| 27  |                   | exp Clinical Trials as topic/                                             | 332,032   |
| 28  |                   | or/13-27                                                                  | 1,314,469 |
| 29  |                   | (clinical adj trial\$).tw.                                                | 321,055   |
| 30  |                   | ((singl\$ or doubl\$ or treb\$ or tripl\$) adj (blind\$3 or mask\$3)).tw. | 167,602   |
| 31  |                   | placebos/                                                                 | 36,429    |
| 32  |                   | placebo\$.tw.                                                             | 208,937   |
| 33  |                   | randomly allocated.tw.                                                    | 25,043    |
| 34  |                   | (allocated adj2 random\$).tw.                                             | 28,196    |
| 35  |                   | or/29-34                                                                  | 582,914   |
| 36  |                   | 28 or 35                                                                  | 1,540,682 |
| 37  |                   | case report.tw.                                                           | 275,193   |
| 38  |                   | letter/                                                                   | 1,022,789 |
| 39  |                   | historical article/                                                       | 356,001   |
| 40  |                   | or/37-39                                                                  | 1,639,442 |
| 41  |                   | 36 not 40                                                                 | 1,505,568 |
| 42  | Combined criteria | 4 and 12 and 41                                                           | 2389      |
| 43  | Limits            | limit 42 to english language                                              | 2254      |

**Table A.4**

Search strategy for Cochrane Register of Controlled Trials (Cochrane Register of Controlled Trials September 2017; Search executed: October 12, 2017)

| No. | Criteria          | Strings                                                                                                                                                                   | Hits   |
|-----|-------------------|---------------------------------------------------------------------------------------------------------------------------------------------------------------------------|--------|
| 1   | Population        | exp Skin Neoplasms/                                                                                                                                                       | 1211   |
| 2   |                   | exp melanoma/                                                                                                                                                             | 1087   |
| 3   |                   | ((Skin adj Neoplasm\$) or (Skin adj Cancer\$) or (Skin adj Tumour\$) or (Skin adj Carcinoma\$) or (Skin adj Adenocarcinoma\$) or (Skin adj Sarcoma\$) or Melanoma).ti,ab. | 3436   |
| 4   |                   | or/1-3                                                                                                                                                                    | 3905   |
| 5   | Intervention      | (nivolumab or Opdivo or MDX-1106 or MDX1106 or ONO-4538 or ONO4538 or BMS-936558 or BMS936558).ti,ab.                                                                     | 386    |
| 6   |                   | (ipilimumab or Yervoy or CTLA-4 or CTLA4 or MDX-010 or MDX010 or MDX-101 or MDX101).ti,ab.                                                                                | 553    |
| 7   |                   | (pembrolizumab or lambrolizumab or Keytruda or MK-3475 or MK3475).ti,ab.                                                                                                  | 312    |
| 8   |                   | (trametinib or Mekinist or JTP-74057 or JTP74057 or GSK-1120212 or GSK1120212).ti,ab.                                                                                     | 103    |
| 9   |                   | (dabrafenib or Tafinlar or GSK-2118436 or GSK2118436).ti,ab.                                                                                                              | 87     |
| 10  |                   | exp interferons/                                                                                                                                                          | 4643   |
| 11  |                   | (interferon alpha or interferon alpha or interferon\$).ti,ab.                                                                                                             | 10,354 |
| 12  |                   | or/5-11                                                                                                                                                                   | 12,187 |
| 13  | Combined criteria | 4 and 12                                                                                                                                                                  | 881    |
| 14  | Limits            | limit 13 to english language                                                                                                                                              | 698    |



**Table A.5**

Search strategy for EMBASE (EMBASE 1974 to 2018 May 07; Search executed: May 8, 2018)

| No. | Criteria     | Strings                                                                                                                                                                   | Hits    |
|-----|--------------|---------------------------------------------------------------------------------------------------------------------------------------------------------------------------|---------|
| 1   | Population   | exp Skin Neoplasms/                                                                                                                                                       | 170,534 |
| 2   |              | exp melanoma/                                                                                                                                                             | 141,517 |
| 3   |              | ((Skin adj Neoplasm\$) or (Skin adj Cancer\$) or (Skin adj Tumour\$) or (Skin adj Carcinoma\$) or (Skin adj Adenocarcinoma\$) or (Skin adj Sarcoma\$) or Melanoma).ti,ab. | 153,314 |
| 4   |              | or/1-3                                                                                                                                                                    | 314,659 |
| 5   | Intervention | exp nivolumab/                                                                                                                                                            | 7229    |
| 6   |              | (nivolumab or Opdivo or MDX-1106 or MDX1106 or ONO-4538 or ONO4538 or BMS-936558 or BMS936558).ti,ab.                                                                     | 4009    |
| 7   |              | exp ipilimumab/                                                                                                                                                           | 8902    |
| 8   |              | (ipilimumab or Yervoy or CTLA-4 or CTLA4 or MDX-010 or MDX010 or MDX-101 or MDX101).ti,ab.                                                                                | 15,195  |
| 9   |              | exp pembrolizumab/                                                                                                                                                        | 5792    |
| 10  |              | (pembrolizumab or lambrolizumab or Keytruda or MK-3475 or MK3475).ti,ab.                                                                                                  | 2976    |
| 11  |              | exp trametinib/                                                                                                                                                           | 3104    |
| 12  |              | (trametinib or Mekinist or JTP-74057 or JTP74057 or GSK-1120212 or GSK1120212).ti,ab.                                                                                     | 1492    |
| 13  |              | exp dabrafenib/                                                                                                                                                           | 2824    |
| 14  |              | (dabrafenib or Tafinlar or GSK-2118436 or GSK2118436).ti,ab.                                                                                                              | 1326    |
| 15  |              | exp interferons/                                                                                                                                                          | 476,645 |
| 16  |              | (interferon alpha or interferon alpha or interferon\$).ti,ab.                                                                                                             | 179,944 |
| 17  |              | or/5-16                                                                                                                                                                   | 527,673 |
| 18  | Study design | Clinical trial/                                                                                                                                                           | 969,154 |
| 19  |              | Randomized controlled trial/                                                                                                                                              | 501,444 |
| 20  |              | Controlled clinical trial/                                                                                                                                                | 461,444 |
| 21  |              | Multicenter study/                                                                                                                                                        | 184,816 |
| 22  |              | Phase 3 clinical trial/                                                                                                                                                   | 33,982  |
| 23  |              | Phase 4 clinical trial/                                                                                                                                                   | 2955    |
| 24  |              | Exp randomization/                                                                                                                                                        | 78,193  |
| 25  |              | Single blind procedure/                                                                                                                                                   | 31,288  |
| 26  |              | Double blind procedure/                                                                                                                                                   | 149,577 |
| 27  |              | Crossover procedure                                                                                                                                                       | 55,410  |

| No. | Criteria          | Strings                                                                                                                                                                                                                                                                                                                                                                                                                                                                                                                                                                                                                                                                                                                                                                                                                                                                                                                                                                                                                                                                                                                                                                                                                                           | Hits      |
|-----|-------------------|---------------------------------------------------------------------------------------------------------------------------------------------------------------------------------------------------------------------------------------------------------------------------------------------------------------------------------------------------------------------------------------------------------------------------------------------------------------------------------------------------------------------------------------------------------------------------------------------------------------------------------------------------------------------------------------------------------------------------------------------------------------------------------------------------------------------------------------------------------------------------------------------------------------------------------------------------------------------------------------------------------------------------------------------------------------------------------------------------------------------------------------------------------------------------------------------------------------------------------------------------|-----------|
| 28  |                   | Placebo/                                                                                                                                                                                                                                                                                                                                                                                                                                                                                                                                                                                                                                                                                                                                                                                                                                                                                                                                                                                                                                                                                                                                                                                                                                          | 324,796   |
| 29  |                   | Randomi?ed controlled trial\$.tw.                                                                                                                                                                                                                                                                                                                                                                                                                                                                                                                                                                                                                                                                                                                                                                                                                                                                                                                                                                                                                                                                                                                                                                                                                 | 180,665   |
| 30  |                   | Rct.tw.                                                                                                                                                                                                                                                                                                                                                                                                                                                                                                                                                                                                                                                                                                                                                                                                                                                                                                                                                                                                                                                                                                                                                                                                                                           | 28,337    |
| 31  |                   | (random\$ adj2 allocat\$).tw.                                                                                                                                                                                                                                                                                                                                                                                                                                                                                                                                                                                                                                                                                                                                                                                                                                                                                                                                                                                                                                                                                                                                                                                                                     | 36,631    |
| 32  |                   | Single blind\$.tw.                                                                                                                                                                                                                                                                                                                                                                                                                                                                                                                                                                                                                                                                                                                                                                                                                                                                                                                                                                                                                                                                                                                                                                                                                                | 21,080    |
| 33  |                   | Double blind\$.tw.                                                                                                                                                                                                                                                                                                                                                                                                                                                                                                                                                                                                                                                                                                                                                                                                                                                                                                                                                                                                                                                                                                                                                                                                                                | 189,103   |
| 34  |                   | ((treble or triple) adj blind\$).tw.                                                                                                                                                                                                                                                                                                                                                                                                                                                                                                                                                                                                                                                                                                                                                                                                                                                                                                                                                                                                                                                                                                                                                                                                              | 795       |
| 35  |                   | Placebo\$.tw.                                                                                                                                                                                                                                                                                                                                                                                                                                                                                                                                                                                                                                                                                                                                                                                                                                                                                                                                                                                                                                                                                                                                                                                                                                     | 273,736   |
| 36  |                   | Prospective study/                                                                                                                                                                                                                                                                                                                                                                                                                                                                                                                                                                                                                                                                                                                                                                                                                                                                                                                                                                                                                                                                                                                                                                                                                                | 446,354   |
| 37  |                   | or/18-36                                                                                                                                                                                                                                                                                                                                                                                                                                                                                                                                                                                                                                                                                                                                                                                                                                                                                                                                                                                                                                                                                                                                                                                                                                          | 1,991,193 |
| 38  |                   | Case study/                                                                                                                                                                                                                                                                                                                                                                                                                                                                                                                                                                                                                                                                                                                                                                                                                                                                                                                                                                                                                                                                                                                                                                                                                                       | 54,243    |
| 39  |                   | Case report.tw.                                                                                                                                                                                                                                                                                                                                                                                                                                                                                                                                                                                                                                                                                                                                                                                                                                                                                                                                                                                                                                                                                                                                                                                                                                   | 362,697   |
| 40  |                   | Abstract report/ or letter/                                                                                                                                                                                                                                                                                                                                                                                                                                                                                                                                                                                                                                                                                                                                                                                                                                                                                                                                                                                                                                                                                                                                                                                                                       | 1,059,268 |
| 41  |                   | Conference proceeding.pt.                                                                                                                                                                                                                                                                                                                                                                                                                                                                                                                                                                                                                                                                                                                                                                                                                                                                                                                                                                                                                                                                                                                                                                                                                         | 0         |
| 42  |                   | Conference abstract.pt.                                                                                                                                                                                                                                                                                                                                                                                                                                                                                                                                                                                                                                                                                                                                                                                                                                                                                                                                                                                                                                                                                                                                                                                                                           | 2,999,760 |
| 43  |                   | Editorial.pt.                                                                                                                                                                                                                                                                                                                                                                                                                                                                                                                                                                                                                                                                                                                                                                                                                                                                                                                                                                                                                                                                                                                                                                                                                                     | 565,196   |
| 44  |                   | Letter.pt.                                                                                                                                                                                                                                                                                                                                                                                                                                                                                                                                                                                                                                                                                                                                                                                                                                                                                                                                                                                                                                                                                                                                                                                                                                        | 1,019,617 |
| 45  |                   | Note.pt.                                                                                                                                                                                                                                                                                                                                                                                                                                                                                                                                                                                                                                                                                                                                                                                                                                                                                                                                                                                                                                                                                                                                                                                                                                          | 713,143   |
| 46  |                   | or/38-45                                                                                                                                                                                                                                                                                                                                                                                                                                                                                                                                                                                                                                                                                                                                                                                                                                                                                                                                                                                                                                                                                                                                                                                                                                          | 5,708,740 |
| 47  |                   | 37 not 46                                                                                                                                                                                                                                                                                                                                                                                                                                                                                                                                                                                                                                                                                                                                                                                                                                                                                                                                                                                                                                                                                                                                                                                                                                         | 1,541,018 |
| 48  | Combined criteria | 4 and 17 and 47                                                                                                                                                                                                                                                                                                                                                                                                                                                                                                                                                                                                                                                                                                                                                                                                                                                                                                                                                                                                                                                                                                                                                                                                                                   | 4367      |
| 49  |                   | 48 not (conference abstract or review or letter or meta-analysis or case report or case series or posters or News or Newspaper article or meeting abstracts or lectures or interview or historical article or handbooks or guidelines or guidebooks or essays or editorial or database or comment or clinical conference or catalogs or case reports or Short Survey or Note or Erratum or Chapter or book series or book or Conference Paper or Conference Proceeding: Article or Conference Proceeding: Conference Paper or Conference Proceeding: Editorial or Conference Proceeding: Note or Conference Proceeding: Review or Journal: Book or Journal: Conference Abstract or Journal: Conference Paper or Journal: Conference Review or Journal: Editorial or Journal: Erratum or Journal: Letter or Journal: Note or Journal: Patent or Journal: Press Release or Journal: Review or Journal: Short Survey or Report or Report: Article or Report: Editorial or Report: Letter or Report: Review or Trade Journal: Conference Paper or Trade Journal: Conference Review or Trade Journal: Editorial or Trade Journal: Erratum or Trade Journal: Note or Trade Journal: Letter or Trade Journal: Review or Trade Journal: Short Survey).pt. | 1998      |

| No. | Criteria | Strings                      | Hits |
|-----|----------|------------------------------|------|
| 50  | Limits   | limit 49 to english language | 1895 |
| 51  |          | limit 50 to yr=2017-2018     | 173  |

**Table A.6**

Search strategy for MEDLINE (Ovid MEDLINE(R) In-Process & Other Non-Indexed Citations, Ovid MEDLINE(R) Daily and Ovid MEDLINE(R) 1946 to Present; Search executed: May 8, 2018)

| No. | Criteria                        | Strings                                                                                                                                                                   | Hits                                   |         |
|-----|---------------------------------|---------------------------------------------------------------------------------------------------------------------------------------------------------------------------|----------------------------------------|---------|
| 1   | Population                      | exp Skin Neoplasms/                                                                                                                                                       | 114,555                                |         |
| 2   |                                 | exp melanoma/                                                                                                                                                             | 86,405                                 |         |
| 3   |                                 | ((Skin adj Neoplasm\$) or (Skin adj Cancer\$) or (Skin adj Tumour\$) or (Skin adj Carcinoma\$) or (Skin adj Adenocarcinoma\$) or (Skin adj Sarcoma\$) or Melanoma).ti,ab. | 112,846                                |         |
| 4   |                                 | or/1-3                                                                                                                                                                    | 200,609                                |         |
| 5   | Intervention                    | (nivolumab or Opdivo or MDX-1106 or MDX1106 or ONO-4538 or ONO4538 or BMS-936558 or BMS936558).ti,ab.                                                                     | 1820                                   |         |
| 6   |                                 | (ipilimumab or Yervoy or CTLA-4 or CTLA4 or MDX-010 or MDX010 or MDX-101 or MDX101).ti,ab.                                                                                | 8531                                   |         |
| 7   |                                 | (pembrolizumab or lambrolizumab or Keytruda or MK-3475 or MK3475).ti,ab.                                                                                                  | 1211                                   |         |
| 8   |                                 | (dabrafenib or Tafinlar or GSK-2118436 or GSK2118436).ti,ab.                                                                                                              | 652                                    |         |
| 9   |                                 | (trametinib or Mekinist or JTP-74057 or JTP74057 or GSK-1120212 or GSK1120212).ti,ab.                                                                                     | 636                                    |         |
| 10  |                                 | exp interferons/                                                                                                                                                          | 126,998                                |         |
| 11  |                                 | (interferon alpha or interferon alpha or interferon\$).ti,ab.                                                                                                             | 140,570                                |         |
| 12  |                                 | or/5-11                                                                                                                                                                   | 192,522                                |         |
| 13  |                                 | Study design                                                                                                                                                              | Randomized Controlled Trials as Topic/ | 116,037 |
| 14  |                                 |                                                                                                                                                                           | randomized controlled trial/           | 460,338 |
| 15  | random Allocation/              |                                                                                                                                                                           | 94,117                                 |         |
| 16  | double Blind Method/            |                                                                                                                                                                           | 145,676                                |         |
| 17  | single Blind Method/            |                                                                                                                                                                           | 25,111                                 |         |
| 18  | clinical trial/                 |                                                                                                                                                                           | 510,132                                |         |
| 19  | clinical trial, phase i.pt.     |                                                                                                                                                                           | 18,060                                 |         |
| 20  | clinical trial, phase ii.pt.    |                                                                                                                                                                           | 29,170                                 |         |
| 21  | clinical trial, phase iii.pt.   |                                                                                                                                                                           | 13,766                                 |         |
| 22  | clinical trial, phase iv.pt.    |                                                                                                                                                                           | 1522                                   |         |
| 23  | controlled clinical trial.pt.   |                                                                                                                                                                           | 92,385                                 |         |
| 24  | randomized controlled trial.pt. |                                                                                                                                                                           | 460,338                                |         |

| No. | Criteria          | Strings                                                                   | Hits      |
|-----|-------------------|---------------------------------------------------------------------------|-----------|
| 25  |                   | multicenter study.pt.                                                     | 233,164   |
| 26  |                   | clinical trial.pt.                                                        | 510,132   |
| 27  |                   | exp Clinical Trials as topic/                                             | 313,579   |
| 28  |                   | or/13-27                                                                  | 1,234,822 |
| 29  |                   | (clinical adj trial\$.tw.                                                 | 306,666   |
| 30  |                   | ((singl\$ or doubl\$ or treb\$ or tripl\$) adj (blind\$3 or mask\$3)).tw. | 156,492   |
| 31  |                   | placebos/                                                                 | 33,897    |
| 32  |                   | placebo\$.tw.                                                             | 194,987   |
| 33  |                   | randomly allocated.tw.                                                    | 24,170    |
| 34  |                   | (allocated adj2 random\$.tw.                                              | 27,202    |
| 35  |                   | or/29-34                                                                  | 552,511   |
| 36  |                   | 28 or 35                                                                  | 1,456,341 |
| 37  |                   | case report.tw.                                                           | 270,211   |
| 38  |                   | letter/                                                                   | 986,050   |
| 39  |                   | historical article/                                                       | 344,724   |
| 40  |                   | or/37-39                                                                  | 1,586,814 |
| 41  |                   | 36 not 40                                                                 | 1,423,126 |
| 42  | Combined criteria | 4 and 12 and 41                                                           | 2207      |
| 43  | Limits            | limit 42 to english language                                              | 2073      |
| 44  |                   | limit 43 to yr=2017-2018                                                  | 223       |

**Table A.7**

Search strategy for Cochrane Register of Controlled Trials (Cochrane Register of Controlled Trials March 2018; Search executed: May 8, 2018)

| No. | Criteria          | Strings                                                                                                                                                                   | Hits   |
|-----|-------------------|---------------------------------------------------------------------------------------------------------------------------------------------------------------------------|--------|
| 1   | Population        | exp Skin Neoplasms/                                                                                                                                                       | 1250   |
| 2   |                   | exp melanoma/                                                                                                                                                             | 1114   |
| 3   |                   | ((Skin adj Neoplasm\$) or (Skin adj Cancer\$) or (Skin adj Tumour\$) or (Skin adj Carcinoma\$) or (Skin adj Adenocarcinoma\$) or (Skin adj Sarcoma\$) or Melanoma).ti,ab. | 3652   |
| 4   |                   | or/1-3                                                                                                                                                                    | 4126   |
| 5   | Intervention      | (nivolumab or Opdivo or MDX-1106 or MDX1106 or ONO-4538 or ONO4538 or BMS-936558 or BMS936558).ti,ab.                                                                     | 526    |
| 6   |                   | (ipilimumab or Yervoy or CTLA-4 or CTLA4 or MDX-010 or MDX010 or MDX-101 or MDX101).ti,ab.                                                                                | 647    |
| 7   |                   | (pembrolizumab or lambrolizumab or Keytruda or MK-3475 or MK3475).ti,ab.                                                                                                  | 413    |
| 8   |                   | (trametinib or Mekinist or JTP-74057 or JTP74057 or GSK-1120212 or GSK1120212).ti,ab.                                                                                     | 128    |
| 9   |                   | (dabrafenib or Tafinlar or GSK-2118436 or GSK2118436).ti,ab.                                                                                                              | 107    |
| 10  |                   | exp interferons/                                                                                                                                                          | 4695   |
| 11  |                   | (interferon alpha or interferon alpha or interferon\$).ti,ab.                                                                                                             | 10,554 |
| 12  |                   | or/5-11                                                                                                                                                                   | 12,677 |
| 13  | Combined criteria | 4 and 12                                                                                                                                                                  | 967    |
| 14  | Limits            | limit 13 to english language                                                                                                                                              | 841    |
| 15  |                   | limit 14 to yr=2017-2018                                                                                                                                                  | 221    |

**Table A.8**

Search strategy for EMBASE (EMBASE 1974 to 2019 April 30; Search executed: May 1, 2019)

| No. | Criteria          | Strings                                                                                                                                                                   | Hits    |
|-----|-------------------|---------------------------------------------------------------------------------------------------------------------------------------------------------------------------|---------|
| 1   | Population        | exp Skin Neoplasms/                                                                                                                                                       | 168,649 |
| 2   | Population        | exp melanoma/                                                                                                                                                             | 145,320 |
| 3   | Population        | ((Skin adj Neoplasm\$) or (Skin adj Cancer\$) or (Skin adj Tumour\$) or (Skin adj Carcinoma\$) or (Skin adj Adenocarcinoma\$) or (Skin adj Sarcoma\$) or Melanoma).ti,ab. | 161,282 |
| 4   | Combined criteria | or/1-3                                                                                                                                                                    | 318,535 |
| 5   | Intervention      | exp nivolumab/                                                                                                                                                            | 11,079  |
| 6   | Intervention      | (nivolumab or Opdivo or MDX-1106 or MDX1106 or ONO-4538 or ONO4538 or BMS-936558 or BMS936558).ti,ab.                                                                     | 6420    |
| 7   | Intervention      | exp ipilimumab/                                                                                                                                                           | 10,872  |
| 8   | Intervention      | (ipilimumab or Yervoy or CTLA-4 or CTLA4 or MDX-010 or MDX010 or MDX-101 or MDX101).ti,ab.                                                                                | 17,681  |
| 9   | Intervention      | exp pembrolizumab/                                                                                                                                                        | 9111    |
| 10  | Intervention      | (pembrolizumab or lambrolizumab or Keytruda or MK-3475 or MK3475).ti,ab.                                                                                                  | 4886    |
| 11  | Intervention      | exp trametinib/                                                                                                                                                           | 3848    |
| 12  | Intervention      | (trametinib or Mekinist or JTP-74057 or JTP74057 or GSK-1120212 or GSK1120212).ti,ab.                                                                                     | 1882    |
| 13  | Intervention      | exp dabrafenib/                                                                                                                                                           | 3348    |
| 14  | Intervention      | (dabrafenib or Tafinlar or GSK-2118436 or GSK2118436).ti,ab.                                                                                                              | 1591    |
| 15  | Intervention      | exp interferons/                                                                                                                                                          | 503731  |
| 16  | Intervention      | (interferon alpha or interferon alpha or interferon\$).ti,ab.                                                                                                             | 185611  |
| 17  | Combined criteria | or/5-16                                                                                                                                                                   | 563,635 |
| 18  | Study design      | Clinical trial/                                                                                                                                                           | 956,736 |
| 19  | Study design      | Randomized controlled trial/                                                                                                                                              | 545,818 |
| 20  | Study design      | Controlled clinical trial/                                                                                                                                                | 461,840 |
| 21  | Study design      | Multicenter study/                                                                                                                                                        | 213,864 |
| 22  | Study design      | Phase 3 clinical trial/                                                                                                                                                   | 39,457  |
| 23  | Study design      | Phase 4 clinical trial/                                                                                                                                                   | 3377    |
| 24  | Study design      | Exp randomization/                                                                                                                                                        | 82,297  |
| 25  | Study design      | Single blind procedure/                                                                                                                                                   | 34,807  |
| 26  | Study design      | Double blind procedure/                                                                                                                                                   | 159,700 |
| 27  | Study design      | Crossover procedure                                                                                                                                                       | 58,880  |
| 28  | Study design      | Placebo/                                                                                                                                                                  | 332,889 |

|    |                   |                                                                                                                                                                                                                                                                                                                                                                                                                                                                                                                                                                                                                                                                                                                                                                                                                                                                                                                                                                                                                                                                                                                                                                                                                                                   |           |
|----|-------------------|---------------------------------------------------------------------------------------------------------------------------------------------------------------------------------------------------------------------------------------------------------------------------------------------------------------------------------------------------------------------------------------------------------------------------------------------------------------------------------------------------------------------------------------------------------------------------------------------------------------------------------------------------------------------------------------------------------------------------------------------------------------------------------------------------------------------------------------------------------------------------------------------------------------------------------------------------------------------------------------------------------------------------------------------------------------------------------------------------------------------------------------------------------------------------------------------------------------------------------------------------|-----------|
| 29 | Study design      | Randomi?ed controlled trial\$.tw.                                                                                                                                                                                                                                                                                                                                                                                                                                                                                                                                                                                                                                                                                                                                                                                                                                                                                                                                                                                                                                                                                                                                                                                                                 | 200,270   |
| 30 | Study design      | Rct.tw.                                                                                                                                                                                                                                                                                                                                                                                                                                                                                                                                                                                                                                                                                                                                                                                                                                                                                                                                                                                                                                                                                                                                                                                                                                           | 32,052    |
| 31 | Study design      | (random\$ adj2 allocat\$).tw.                                                                                                                                                                                                                                                                                                                                                                                                                                                                                                                                                                                                                                                                                                                                                                                                                                                                                                                                                                                                                                                                                                                                                                                                                     | 39,493    |
| 32 | Study design      | Single blind\$.tw.                                                                                                                                                                                                                                                                                                                                                                                                                                                                                                                                                                                                                                                                                                                                                                                                                                                                                                                                                                                                                                                                                                                                                                                                                                | 22,741    |
| 33 | Study design      | Double blind\$.tw.                                                                                                                                                                                                                                                                                                                                                                                                                                                                                                                                                                                                                                                                                                                                                                                                                                                                                                                                                                                                                                                                                                                                                                                                                                | 196,891   |
| 34 | Study design      | ((treble or triple) adj blind\$).tw.                                                                                                                                                                                                                                                                                                                                                                                                                                                                                                                                                                                                                                                                                                                                                                                                                                                                                                                                                                                                                                                                                                                                                                                                              | 949       |
| 35 | Study design      | Placebo\$.tw.                                                                                                                                                                                                                                                                                                                                                                                                                                                                                                                                                                                                                                                                                                                                                                                                                                                                                                                                                                                                                                                                                                                                                                                                                                     | 287,920   |
| 36 | Study design      | Prospective study/                                                                                                                                                                                                                                                                                                                                                                                                                                                                                                                                                                                                                                                                                                                                                                                                                                                                                                                                                                                                                                                                                                                                                                                                                                | 514,568   |
| 37 | Combined criteria | or/18-36                                                                                                                                                                                                                                                                                                                                                                                                                                                                                                                                                                                                                                                                                                                                                                                                                                                                                                                                                                                                                                                                                                                                                                                                                                          | 2,121,103 |
| 38 | Study design      | Case study/                                                                                                                                                                                                                                                                                                                                                                                                                                                                                                                                                                                                                                                                                                                                                                                                                                                                                                                                                                                                                                                                                                                                                                                                                                       | 60,785    |
| 39 | Study design      | Case report.tw.                                                                                                                                                                                                                                                                                                                                                                                                                                                                                                                                                                                                                                                                                                                                                                                                                                                                                                                                                                                                                                                                                                                                                                                                                                   | 379,672   |
| 40 | Study design      | Abstract report/ or letter/                                                                                                                                                                                                                                                                                                                                                                                                                                                                                                                                                                                                                                                                                                                                                                                                                                                                                                                                                                                                                                                                                                                                                                                                                       | 1,095,361 |
| 41 | Study design      | Conference proceeding.pt.                                                                                                                                                                                                                                                                                                                                                                                                                                                                                                                                                                                                                                                                                                                                                                                                                                                                                                                                                                                                                                                                                                                                                                                                                         | 0         |
| 42 | Study design      | Conference abstract.pt.                                                                                                                                                                                                                                                                                                                                                                                                                                                                                                                                                                                                                                                                                                                                                                                                                                                                                                                                                                                                                                                                                                                                                                                                                           | 3,390,909 |
| 43 | Study design      | Editorial.pt.                                                                                                                                                                                                                                                                                                                                                                                                                                                                                                                                                                                                                                                                                                                                                                                                                                                                                                                                                                                                                                                                                                                                                                                                                                     | 598,106   |
| 44 | Study design      | Letter.pt.                                                                                                                                                                                                                                                                                                                                                                                                                                                                                                                                                                                                                                                                                                                                                                                                                                                                                                                                                                                                                                                                                                                                                                                                                                        | 1,059,364 |
| 45 | Study design      | Note.pt.                                                                                                                                                                                                                                                                                                                                                                                                                                                                                                                                                                                                                                                                                                                                                                                                                                                                                                                                                                                                                                                                                                                                                                                                                                          | 749,085   |
| 46 | Combined criteria | or/38-45                                                                                                                                                                                                                                                                                                                                                                                                                                                                                                                                                                                                                                                                                                                                                                                                                                                                                                                                                                                                                                                                                                                                                                                                                                          | 6,217,068 |
| 47 | Combined criteria | 37 not 46                                                                                                                                                                                                                                                                                                                                                                                                                                                                                                                                                                                                                                                                                                                                                                                                                                                                                                                                                                                                                                                                                                                                                                                                                                         | 1,602,410 |
| 48 | Combined criteria | 4 and 17 and 47                                                                                                                                                                                                                                                                                                                                                                                                                                                                                                                                                                                                                                                                                                                                                                                                                                                                                                                                                                                                                                                                                                                                                                                                                                   | 4498      |
| 49 | Combined criteria | 48 not (conference abstract or review or letter or meta-analysis or case report or case series or posters or News or Newspaper article or meeting abstracts or lectures or interview or historical article or handbooks or guidelines or guidebooks or essays or editorial or database or comment or clinical conference or catalogs or case reports or Short Survey or Note or Erratum or Chapter or book series or book or Conference Paper or Conference Proceeding: Article or Conference Proceeding: Conference Paper or Conference Proceeding: Editorial or Conference Proceeding: Note or Conference Proceeding: Review or Journal: Book or Journal: Conference Abstract or Journal: Conference Paper or Journal: Conference Review or Journal: Editorial or Journal: Erratum or Journal: Letter or Journal: Note or Journal: Patent or Journal: Press Release or Journal: Review or Journal: Short Survey or Report or Report: Article or Report: Editorial or Report: Letter or Report: Review or Trade Journal: Conference Paper or Trade Journal: Conference Review or Trade Journal: Editorial or Trade Journal: Erratum or Trade Journal: Note or Trade Journal: Letter or Trade Journal: Review or Trade Journal: Short Survey).pt. | 1980      |



**Table A.9**

Search strategy for MEDLINE (Ovid MEDLINE(R) In-Process & Other Non-Indexed Citations, Ovid MEDLINE(R) Daily and Ovid MEDLINE(R) 1946 to Present; Search executed: May 1, 2019)

| No. | Criteria          | Strings                                                                                                                                                                   | Hits    |
|-----|-------------------|---------------------------------------------------------------------------------------------------------------------------------------------------------------------------|---------|
| 1   | Population        | exp Skin Neoplasms/                                                                                                                                                       | 119,018 |
| 2   | Population        | exp melanoma/                                                                                                                                                             | 89,978  |
| 3   | Population        | ((Skin adj Neoplasm\$) or (Skin adj Cancer\$) or (Skin adj Tumour\$) or (Skin adj Carcinoma\$) or (Skin adj Adenocarcinoma\$) or (Skin adj Sarcoma\$) or Melanoma).ti,ab. | 118,685 |
| 4   | Combined criteria | or/1-3                                                                                                                                                                    | 209,221 |
| 5   | Intervention      | (nivolumab or Opdivo or MDX-1106 or MDX1106 or ONO-4538 or ONO4538 or BMS-936558 or BMS936558).ti,ab.                                                                     | 2710    |
| 6   | Intervention      | (ipilimumab or Yervoy or CTLA-4 or CTLA4 or MDX-010 or MDX010 or MDX-101 or MDX101).ti,ab.                                                                                | 9579    |
| 7   | Intervention      | (pembrolizumab or lambrolizumab or Keytruda or MK-3475 or MK3475).ti,ab.                                                                                                  | 1900    |
| 8   | Intervention      | (dabrafenib or Tafinlar or GSK-2118436 or GSK2118436).ti,ab.                                                                                                              | 744     |
| 9   | Intervention      | (trametinib or Mekinist or JTP-74057 or JTP74057 or GSK-1120212 or GSK1120212).ti,ab.                                                                                     | 785     |
| 10  | Intervention      | exp interferons/                                                                                                                                                          | 130,019 |
| 11  | Intervention      | (interferon alpha or interferon alpha or interferon\$).ti,ab.                                                                                                             | 145,442 |
| 12  | Combined criteria | or/5-11                                                                                                                                                                   | 200,668 |
| 13  | Study design      | Randomized Controlled Trials as Topic/                                                                                                                                    | 123,342 |
| 14  | Study design      | randomized controlled trial/                                                                                                                                              | 481,119 |
| 15  | Study design      | random Allocation/                                                                                                                                                        | 98,800  |
| 16  | Study design      | double Blind Method/                                                                                                                                                      | 151,012 |
| 17  | Study design      | single Blind Method/                                                                                                                                                      | 26,667  |
| 18  | Study design      | clinical trial/                                                                                                                                                           | 515,964 |
| 19  | Study design      | clinical trial, phase i.pt.                                                                                                                                               | 18,863  |
| 20  | Study design      | clinical trial, phase ii.pt.                                                                                                                                              | 30,502  |
| 21  | Study design      | clinical trial, phase iii.pt.                                                                                                                                             | 14,982  |
| 22  | Study design      | clinical trial, phase iv.pt.                                                                                                                                              | 1701    |
| 23  | Study design      | controlled clinical trial.pt.                                                                                                                                             | 93,049  |
| 24  | Study design      | randomized controlled trial.pt.                                                                                                                                           | 481,119 |
| 25  | Study design      | multicenter study.pt.                                                                                                                                                     | 249,453 |
| 26  | Study design      | clinical trial.pt.                                                                                                                                                        | 515,964 |

|    |                   |                                                                           |           |
|----|-------------------|---------------------------------------------------------------------------|-----------|
| 27 | Study design      | exp Clinical Trials as topic/                                             | 325,170   |
| 28 | Combined criteria | or/13-27                                                                  | 1,290,556 |
| 29 | Study design      | (clinical adj trial\$.tw.                                                 | 331,419   |
| 30 | Study design      | ((singl\$ or doubl\$ or treb\$ or tripl\$) adj (blind\$3 or mask\$3)).tw. | 163,286   |
| 31 | Study design      | placebos/                                                                 | 34,328    |
| 32 | Study design      | placebo\$.tw.                                                             | 203,752   |
| 33 | Study design      | randomly allocated.tw.                                                    | 26,123    |
| 34 | Study design      | (allocated adj2 random\$).tw.                                             | 29,266    |
| 35 | Combined criteria | or/29-34                                                                  | 587,205   |
| 36 | Combined criteria | 28 or 35                                                                  | 1,531,398 |
| 37 | Study design      | case report.tw.                                                           | 275,418   |
| 38 | Study design      | letter/                                                                   | 1,025,227 |
| 39 | Study design      | historical article/                                                       | 351,205   |
| 40 | Combined criteria | or/37-39                                                                  | 1,636,972 |
| 41 | Combined criteria | 36 not 40                                                                 | 1,496,835 |
| 42 | Combined criteria | 4 and 12 and 41                                                           | 2356      |
| 43 | Limits            | limit 42 to english language                                              | 2218      |

**Table A.10**

Search strategy for Cochrane Register of Controlled Trials (Cochrane Register of Controlled Trials April 2019; Search executed: May 1, 2019)

| No. | Criteria          | Strings                                                                                                                                                                   | Hits   |
|-----|-------------------|---------------------------------------------------------------------------------------------------------------------------------------------------------------------------|--------|
| 1   | Population        | exp Skin Neoplasms/                                                                                                                                                       | 1410   |
| 2   | Population        | exp melanoma/                                                                                                                                                             | 1561   |
| 3   | Population        | ((Skin adj Neoplasm\$) or (Skin adj Cancer\$) or (Skin adj Tumour\$) or (Skin adj Carcinoma\$) or (Skin adj Adenocarcinoma\$) or (Skin adj Sarcoma\$) or Melanoma).ti,ab. | 5511   |
| 4   | Combined criteria | or/1-3                                                                                                                                                                    | 6056   |
| 5   | Intervention      | (pembrolizumab or lambrolizumab or Keytruda or MK-3475 or MK3475).ti,ab.                                                                                                  | 933    |
| 6   | Intervention      | (nivolumab or Opdivo or MDX-1106 or MDX1106 or ONO-4538 or ONO4538 or BMS-936558 or BMS936558).ti,ab.                                                                     | 1186   |
| 7   | Intervention      | (ipilimumab or Yervoy or CTLA-4 or CTLA4 or MDX-010 or MDX010 or MDX-101 or MDX101).ti,ab.                                                                                | 1186   |
| 8   | Intervention      | (trametinib or Mekinist or JTP-74057 or JTP74057 or GSK-1120212 or GSK1120212).ti,ab.                                                                                     | 215    |
| 9   | Intervention      | (dabrafenib or Tafinlar or GSK-2118436 or GSK2118436).ti,ab.                                                                                                              | 174    |
| 10  | Intervention      | exp interferons/                                                                                                                                                          | 5358   |
| 11  | Intervention      | (interferon alpha or interferon alpha or interferon\$).ti,ab.                                                                                                             | 13,252 |
| 12  | Combined criteria | or/5-11                                                                                                                                                                   | 16,956 |
| 13  | Combined criteria | 4 and 12                                                                                                                                                                  | 1457   |
| 14  | Limits            | limit 13 to english language                                                                                                                                              | 1073   |

## Patient characteristics, risk of bias, and safety data

**Table A.11**

Patient characteristics in randomized controlled trials included in network meta-analyses

| Trial ID                                       | Intervention                      | N   | Median age, years (range) | Male, n (%) | Race, n (%) |         |          |
|------------------------------------------------|-----------------------------------|-----|---------------------------|-------------|-------------|---------|----------|
|                                                |                                   |     |                           |             | Caucasian   | Asian   | Hispanic |
| Trials included in final network meta-analyses |                                   |     |                           |             |             |         |          |
| ECOG 1697 <sup>1</sup>                         | IFN alfa-2b (high-dose)           | 581 | 52 (10–85)                | 336 (58)    | 547 (94)    | 0       | 4 (1)    |
|                                                | Observation                       | 569 | 52 (19–81)                | 320 (56)    | 536 (94)    | 2 (< 1) | 4 (1)    |
| Scottish Study <sup>2</sup>                    | IFN alfa-2b (low-dose)            | 47  | NR                        | NR          | NR          | NR      | NR       |
|                                                | Observation                       | 49  | NR                        | NR          | NR          | NR      | NR       |
| WHO Melanoma Programme Trial 16 <sup>3</sup>   | IFN alfa-2b (low-dose)            | 225 | NR                        | 131 (58)    | NR          | NR      | NR       |
|                                                | Observation                       | 219 | NR                        | 114 (52)    | NR          | NR      | NR       |
| EORTC 18071 <sup>4</sup>                       | Ipilimumab                        | 475 | 51 (20–84) <sup>a</sup>   | 296 (62)    | 470 (99)    | 1 (< 1) | NR       |
|                                                | Placebo                           | 476 | 52 (18–78) <sup>a</sup>   | 293 (62)    | 476 (100)   | 0       | NR       |
| EORTC 18952 <sup>5</sup>                       | IFN alfa-2b (high-dose/13 months) | 553 | 49 (17–74)                | 312 (56)    | NR          | NR      | NR       |
|                                                | IFN alfa-2b (low-dose/25 months)  | 556 | 50 (16–75)                | 308 (55)    | NR          | NR      | NR       |
|                                                | Observation                       | 279 | 47 (20–75)                | 152 (54)    | NR          | NR      | NR       |
| EORTC 18991 <sup>6</sup>                       | PEG IFN alfa-2b                   | 627 | 50 (19–70)                | 366 (58)    | NR          | NR      | NR       |
|                                                | Observation                       | 629 | 50 (18–70)                | 367 (58)    | NR          | NR      | NR       |

| Trial ID                                 | Intervention                                                    | N   | Median age, years (range) | Male, n (%) | Race, n (%) |       |          |
|------------------------------------------|-----------------------------------------------------------------|-----|---------------------------|-------------|-------------|-------|----------|
|                                          |                                                                 |     |                           |             | Caucasian   | Asian | Hispanic |
| KEYNOTE-054 <sup>7,8</sup>               | Pembrolizumab                                                   | 514 | 54 (19–83)                | 324 (63)    | NR          | NR    | NR       |
|                                          | Placebo                                                         | 505 | 54 (19–83)                | 304 (60)    | NR          | NR    | NR       |
| S0008 <sup>9</sup>                       | IFN alfa-2b (high-dose)                                         | 203 | 48 (12–73)                | 141 (69)    | 195 (96)    | NR    | NR       |
|                                          | Other chemotherapy                                              | 199 | 46 (10–74)                | 141 (71)    | 190 (95)    | NR    | NR       |
| Garbe et al. (2008; DeCOG) <sup>10</sup> | IFN alfa-2a (low-dose)                                          | 146 | NR                        | 92 (63)     | NR          | NR    | NR       |
|                                          | IFN alfa-2a + dacarbazine                                       | 148 | NR                        | 93 (63)     | NR          | NR    | NR       |
|                                          | Observation                                                     | 147 | NR                        | 85 (58)     | NR          | NR    | NR       |
| COMBI-AD <sup>11</sup>                   | Dabrafenib + trametinib                                         | 435 | 50 (18–89)                | 244 (56)    | NR          | NR    | NR       |
|                                          | Placebo                                                         | 432 | 51 (20–85)                | 239 (55)    | NR          | NR    | NR       |
| AIM HIGH Study <sup>12</sup>             | IFN alfa-2a (low-dose)                                          | 338 | 51 (16–79) <sup>a</sup>   | 191 (56)    | NR          | NR    | NR       |
|                                          | Observation                                                     | 336 | 52 (15–85) <sup>a</sup>   | 190 (57)    | NR          | NR    | NR       |
| Nordic IFN Trial <sup>13</sup>           | IFN alfa-2b (1 year)                                            | 285 | 53 (18–73)                | 177 (62)    | –           | –     | –        |
|                                          | IFN alfa-2b (2 years)                                           | 286 | 51 (22–77)                | 183 (64)    | –           | –     | –        |
|                                          | Observation                                                     | 284 | 51 (18–76)                | 167 (59)    | –           | –     | –        |
| Kim et al. (2009) <sup>14</sup>          | Cisplatin, vinblastine, dacarbazine, IFN alfa-2b, interleukin-2 | 71  | NR                        | 44 (62)     | NR          | NR    | NR       |
|                                          | IFN alfa-2b (high-dose)                                         | 33  | NR                        | 17 (52)     | NR          | NR    | NR       |

| Trial ID                                         | Intervention                         | N   | Median age, years (range) | Male, n (%) | Race, n (%) |       |          |
|--------------------------------------------------|--------------------------------------|-----|---------------------------|-------------|-------------|-------|----------|
|                                                  |                                      |     |                           |             | Caucasian   | Asian | Hispanic |
|                                                  | IFN alfa-2b (low-dose)               | 33  | NR                        | 19 (58)     | NR          | NR    | NR       |
| ECOG 1690 <sup>15</sup>                          | IFN alfa-2b (low-dose)               | 215 | NR                        | 147 (68)    | NR          | NR    | NR       |
|                                                  | IFN alfa-2b (high-dose)              | 215 | NR                        | 128 (60)    | NR          | NR    | NR       |
|                                                  | Observation                          | 212 | NR                        | 140 (66)    | NR          | NR    | NR       |
| ECOG 1684 <sup>16</sup>                          | IFN alfa-2b (high-dose)              | 143 | NR                        | 90 (63)     | NR          | NR    | NR       |
|                                                  | Observation                          | 137 | NR                        | 79 (58)     | NR          | NR    | NR       |
| EORTC 18871 <sup>17</sup>                        | rIFN alfa-2b                         | 240 | 52 (14–84)                | 127 (53)    | NR          | NR    | NR       |
|                                                  | Observation                          | 244 | 52 (14–84)                | 138 (57)    | NR          | NR    | NR       |
| Stadler et al. (2006) <sup>18</sup>              | Dacarbazine + natural human IFN alfa | 128 | 53 (25–86) <sup>a</sup>   | 73 (57)     | NR          | NR    | NR       |
|                                                  | Observation                          | 124 | 54 (23–82) <sup>a</sup>   | 69 (56)     | NR          | NR    | NR       |
| E1609 <sup>19</sup>                              | Ipilimumab (high-dose)               | 406 | 54 (19–80)                | NR (63)     | NR          | NR    | NR       |
|                                                  | Ipilimumab (low-dose)                | 367 | 55 (19–80)                | NR (67)     | NR          | NR    | NR       |
| CheckMate 238 <sup>20,21</sup>                   | Nivolumab                            | 452 | 56 (19–83)                | 258 (57)    | NR          | NR    | NR       |
|                                                  | Ipilimumab                           | 453 | 54 (18–86)                | 269 (59)    | NR          | NR    | NR       |
| Trials excluded from final network meta-analyses |                                      |     |                           |             |             |       |          |
| Eigentler (2016; DeCOG) <sup>22</sup>            | PEG IFN alfa-2a                      | 451 | NR                        | 242 (54)    | NR          | NR    | NR       |
|                                                  | IFN alfa-2a (low-dose)               | 458 | NR                        | 234 (51)    | NR          | NR    | NR       |
| EADO study <sup>23</sup>                         | PEG IFN alfa-2b                      | 443 | 53 (18–75)                | 266 (60)    | NR          | NR    | NR       |

| Trial ID                                            | Intervention                         | N   | Median age, years (range) | Male, n (%) | Race, n (%) |          |          |
|-----------------------------------------------------|--------------------------------------|-----|---------------------------|-------------|-------------|----------|----------|
|                                                     |                                      |     |                           |             | Caucasian   | Asian    | Hispanic |
|                                                     | IFN alfa-2b (low-dose)               | 453 | 55 (20–76)                | 236 (52)    | NR          | NR       | NR       |
| Lian et al. 2013 <sup>24</sup>                      | IFN alfa-2b (high-dose)              | 63  | 55 (26–84)                | 25 (40)     | NR          | NR       | NR       |
|                                                     | Chemotherapy                         | 63  | 59 (18–75)                | 23 (36)     | NR          | NR       | NR       |
|                                                     | Observation                          | 63  | 57 (25–80)                | 28 (44)     | NR          | NR       | NR       |
| Sunbelt Melanoma Trial <sup>25</sup> (SLN positive) | IFN alfa-2b (high-dose)              | 112 | 46 (40–57) <sup>b</sup>   | 60 (54)     | NR          | NR       | NR       |
|                                                     | Observation                          | 106 | 49 (39–56) <sup>b</sup>   | 60 (57)     | NR          | NR       | NR       |
| Sunbelt Melanoma Trial <sup>25</sup> (SLN negative) | IFN alfa-2b (high-dose)              | 184 | 49 (38–57) <sup>b</sup>   | 84 (46)     | NR          | NR       | NR       |
|                                                     | Observation                          | 192 | 50 (42–59) <sup>b</sup>   | 106 (55)    | NR          | NR       | NR       |
| MM-ADJ-5 <sup>26</sup>                              | IFN alfa-2b (high-dose)              | 316 | 50 (20–76)                | 186 (59)    | 94          | NR       | NR       |
|                                                     | IFN alfa-2b (intermittent high-dose) | 311 | 52 (19–76)                | 174 (56)    | 94          | NR       | NR       |
| Tobin et al. (2018) <sup>27</sup>                   | Ipilimumab                           | 6   | 50 (34–67)                | 3 (50)      | NR          | NR       | NR       |
|                                                     | Ipilimumab + ATRA                    | 4   | 55 (48–60)                | 1 (25)      | NR          | NR       | NR       |
| Wang et al. (2015) <sup>28</sup>                    | IFN alfa-2b (high-dose)              | 96  | 49                        | 51 (53)     | NR          | 96 (100) | NR       |
|                                                     | Observation                          | 52  | 50                        | 29 (56)     | NR          | 52 (100) | NR       |

<sup>a</sup>Mean age.

<sup>b</sup>Interquartile range.

AJCC: American Joint Committee on Cancer; ATRA: all-trans retinoic acid; IFN: interferon; NR: not reported; PEG: pegylated.

**Table A.12**

Cochrane risk of bias assessment of randomized controlled trials included in the feasibility assessment

| Trial ID                                       | Interventions                                                                        | Sequence generation | Allocation concealment | Blinding of participants and personnel | Blinding of outcome assessment | Incomplete outcome data | Selective outcome reporting | Other sources of bias |
|------------------------------------------------|--------------------------------------------------------------------------------------|---------------------|------------------------|----------------------------------------|--------------------------------|-------------------------|-----------------------------|-----------------------|
| Trials included in final network meta-analyses |                                                                                      |                     |                        |                                        |                                |                         |                             |                       |
| ECOG 1697 <sup>1</sup>                         | IFN alfa-2b (high-dose) vs. Observation                                              | Unclear risk        | Low risk               | Low risk                               | Unclear risk                   | Unclear risk            | Low risk                    | Low risk              |
| Scottish Study <sup>2</sup>                    | IFN alfa-2b (low-dose) vs. Observation                                               | Unclear risk        | Low risk               | Low risk                               | Unclear risk                   | Unclear risk            | Unclear risk                | High risk             |
| WHO Melanoma Programme Trial 16 <sup>3</sup>   | IFN alfa-2b (Low-dose) vs. Observation                                               | Low risk            | Low risk               | Low risk                               | Unclear risk                   | Low risk                | Low risk                    | Low risk              |
| EORTC 18071 <sup>4</sup>                       | Ipilimumab vs. Placebo                                                               | Low risk            | Low risk               | Low risk                               | Low risk                       | Low risk                | Unclear risk                | Low risk              |
| EORTC 18952 <sup>5</sup>                       | IFN alfa-2b (High-dose/13months) vs. IFN alfa-2b (Low-dose/25months) vs. Observation | Low risk            | Low risk               | Low risk                               | Unclear risk                   | Low risk                | Low risk                    | Unclear risk          |
| EORTC 18991 <sup>6</sup>                       | PEG IFN alfa-2b vs. Observation                                                      | Low risk            | Low risk               | Low risk                               | Unclear risk                   | Unclear risk            | Low risk                    | Low risk              |
| KEYNOTE-054 <sup>7,8</sup>                     | Pembrolizumab vs Placebo                                                             | Low risk            | Low risk               | Low risk                               | Low risk                       | Low risk                | Low risk                    | Low risk              |
| S0008 <sup>9</sup>                             | IFN alfa-2b (High-Dose) vs. Other chemotherapy                                       | Low risk            | Low risk               | Low risk                               | Unclear risk                   | Low risk                | Unclear risk                | Low risk              |
| Garbe 2008 (DeCOG) <sup>10</sup>               | IFN alfa-2a (low-Dose) vs. IFN alfa-2a                                               | Low risk            | Low risk               | Low risk                               | Unclear risk                   | Low risk                | Low risk                    | Low risk              |



| Trial ID                          | Interventions                                                                                                          | Sequence generation | Allocation concealment | Blinding of participants and personnel | Blinding of outcome assessment | Incomplete outcome data | Selective outcome reporting | Other sources of bias |
|-----------------------------------|------------------------------------------------------------------------------------------------------------------------|---------------------|------------------------|----------------------------------------|--------------------------------|-------------------------|-----------------------------|-----------------------|
|                                   | + dacarbazine vs. Observation                                                                                          |                     |                        |                                        |                                |                         |                             |                       |
| AIM HIGH Study <sup>12</sup>      | IFN alfa-2a (low-dose) vs. Observation                                                                                 | Unclear risk        | Low risk               | Low risk                               | Unclear risk                   | High risk               | Low risk                    | Low risk              |
| Nordic IFN Trial <sup>13</sup>    | IFN alfa-2b (1year) vs. Observation                                                                                    | Low risk            | Low risk               | Low risk                               | High risk                      | Low risk                | Low risk                    | Unclear risk          |
| Kim et al. 2009 <sup>14</sup>     | Cisplatin, Vinblastine, Dacarbazine, IFN alfa-2b, Interleukin-2 vs. IFN alfa-2b (High-dose) vs. IFN alfa-2b (Low-dose) | Unclear risk        | Low risk               | Low risk                               | Unclear risk                   | Low risk                | Low risk                    | Unclear risk          |
| ECOG 1690 <sup>15</sup>           | IFN alfa-2b (Low-dose) vs. IFN alfa-2b (High-dose) vs. Observation                                                     | Low risk            | Low risk               | Low risk                               | Unclear risk                   | Low risk                | Low risk                    | Low risk              |
| ECOG 1684 <sup>16</sup>           | IFN alfa-2b (High-dose) vs. Observation                                                                                | Low risk            | Low risk               | Low risk                               | Unclear risk                   | Low risk                | Low risk                    | Low risk              |
| EORTC 1887 <sup>17</sup>          | rIFN alfa-2b vs. Observation                                                                                           | Unclear risk        | Low risk               | Low risk                               | Unclear risk                   | Low risk                | Low risk                    | Unclear risk          |
| COMBI-AD <sup>11,29</sup>         | Dabrafenib +Trametinib vs. Placebo                                                                                     | Unclear risk        | Low risk               | Low risk                               | Low risk                       | Low risk                | Low risk                    | Low risk              |
| Stadler et al. 2006 <sup>18</sup> | Dacarbazine + natural human IFN alfa vs. Observation                                                                   | Low risk            | Low risk               | Low risk                               | Unclear risk                   | Low risk                | Unclear risk                | Unclear risk          |
| E1609 <sup>19</sup>               | Ipilimumab (High-Dose) vs. Ipilimumab                                                                                  | Unclear risk        | Low risk               | Low risk                               | High risk                      | Unclear risk            | Low risk                    | Low risk              |

| Trial ID                                         | Interventions                                                    | Sequence generation | Allocation concealment | Blinding of participants and personnel | Blinding of outcome assessment | Incomplete outcome data | Selective outcome reporting | Other sources of bias |
|--------------------------------------------------|------------------------------------------------------------------|---------------------|------------------------|----------------------------------------|--------------------------------|-------------------------|-----------------------------|-----------------------|
|                                                  | (Low-Dose) vs. IFN alfa-2b (High-dose)                           |                     |                        |                                        |                                |                         |                             |                       |
| CheckMate 238 <sup>20,21</sup>                   | Nivolumab vs. Ipilimumab                                         | Unclear risk        | Low risk               | Low risk                               | Low risk                       | Low risk                | Low risk                    | Low risk              |
| Trials excluded from final network meta-analyses |                                                                  |                     |                        |                                        |                                |                         |                             |                       |
| Eigentler 2016 (DeCOG) <sup>22</sup>             | PEG IFN alfa-2a vs. IFN alfa-2a (low-dose)                       | Unclear risk        | Low risk               | Low risk                               | Unclear risk                   | Unclear risk            | Low risk                    | Unclear risk          |
| EADO study <sup>23</sup>                         | PEG IFN alfa-2b vs. IFN alfa-2b (low-dose)                       | Low risk            | Low risk               | Low risk                               | Unclear risk                   | Low risk                | Low risk                    | Unclear risk          |
| Lian et al. 2013 <sup>24</sup>                   | IFN alfa-2b (high-dose) vs. Chemotherapy vs. Observation vs.     | Low risk            | Low risk               | Low risk                               | Unclear risk                   | Low risk                | Low risk                    | Low risk              |
| Sunbelt Melanoma Trial <sup>25</sup>             | IFN alfa-2b (high-dose) vs. Observation                          | Low risk            | Low risk               | Low risk                               | Unclear risk                   | Low risk                | Low risk                    | High risk             |
| MM-ADJ-5 <sup>26</sup>                           | IFN alfa-2b (high-dose) vs. IFN alfa-2b (Intermittent High-Dose) | Low risk            | Low risk               | Low risk                               | Unclear risk                   | Unclear risk            | Low risk                    | Low risk              |
| Tobin et al. 2018 <sup>27</sup>                  | Ipilimumab vs Ipilimumab and ATRA                                | Low risk            | Unclear risk           | Low risk                               | Unclear risk                   | Unclear risk            | Unclear risk                | Unclear risk          |
| Wang et al. 2015 <sup>28</sup>                   | IFN alfa-2b (high-dose) vs. Observation                          | Unclear risk        | Low risk               | Low risk                               | Unclear risk                   | Low risk                | Low risk                    | Low risk              |

BSC: best supportive care

**Table A.13**

Safety data from randomized controlled trials included in the feasibility assessment

| Trial ID                                       | Intervention                     | Grade 3/4 adverse events, n (%) | Discontinuations, n (%) | Discontinuations due to adverse events, n (%) |
|------------------------------------------------|----------------------------------|---------------------------------|-------------------------|-----------------------------------------------|
| Trials included in final network meta-analyses |                                  |                                 |                         |                                               |
| ECOG 1697 <sup>1</sup>                         | IFN alfa-2b (High-dose)          | (57.9)                          | NR                      | 38 (6.5)                                      |
|                                                | Observation                      | (4.6)                           | NR                      | 0 (0)                                         |
| Scottish study <sup>2</sup>                    | IFN alfa-2b (Low-dose)           | NR                              | NR                      | NR                                            |
|                                                | Observation                      | NR                              | NR                      | NR                                            |
| WHO Melanoma Programme Trial 16 <sup>3</sup>   | IFN alfa-2b (Low-dose)           | 0 (0)                           | 0 (0)                   | 0 (0)                                         |
|                                                | Observation                      | 0 (0)                           | NR                      | 0 (0)                                         |
| EORTC 18071 <sup>4</sup>                       | Ipilimumab                       | 255 (54.1)                      | 447                     | 244                                           |
|                                                | Placebo                          | 124 (26.2)                      | 411                     | 20                                            |
| EORTC 18952 <sup>5</sup>                       | IFN alfa-2b (High-dose/13months) | NR                              | 534                     | 61                                            |
|                                                | IFN alfa-2b (Low-dose/25months)  | NR                              | 535                     | 70                                            |
|                                                | Observation                      | NR                              | 250                     | 0                                             |
| EORTC 18991 <sup>6</sup>                       | PEG IFN alfa-2b                  | 397                             | NR                      | 228                                           |
|                                                | Observation                      | 100                             | NR                      | 0                                             |
| KEYNOTE-054 <sup>7,8</sup>                     | Pembrolizumab                    | 161 (31.6)                      | 208                     | 70 (13.8)                                     |
|                                                | Placebo                          | 93 (18.5)                       | 202                     | 11 (2.2)                                      |
| S0008 <sup>9</sup>                             | IFN alfa-2b (High-Dose)          | (76)                            | 105                     | 39                                            |
|                                                | Other chemotherapy               | (64)                            | 33                      | 29                                            |
| Garbe 2008 (DeCOG) <sup>10</sup>               | IFN alfa-2a (Low-Dose)           | 13                              | NR                      | 20                                            |
|                                                | IFN alfa-2a + dacarbazine        | 25                              | NR                      | 16                                            |
|                                                | Observation                      | NR                              | NR                      | 2                                             |

| Trial ID                                         | Intervention                                                    | Grade 3/4 adverse events, n (%) | Discontinuations, n (%) | Discontinuations due to adverse events, n (%) |
|--------------------------------------------------|-----------------------------------------------------------------|---------------------------------|-------------------------|-----------------------------------------------|
| AIM HIGH Study <sup>12</sup>                     | IFN alfa-2a (low-dose)                                          | 56                              | NR                      | 50 (14.8)                                     |
|                                                  | Observation                                                     | 14                              | NR                      | NR                                            |
| Nordic IFN Trial <sup>13</sup>                   | IFN alfa-2b (1 year)                                            | NR                              | NR                      | 72                                            |
|                                                  | Observation                                                     | NR                              | NR                      | 0                                             |
| Kim et al. 2009 <sup>14</sup>                    | Cisplatin, Vinblastine, Dacarbazine, IFN alfa-2b, Interleukin-2 | NR                              | NR                      | 4 (6)                                         |
|                                                  | IFN alfa-2b (high-dose)                                         | NR                              | NR                      | 4                                             |
|                                                  | IFN alfa-2b (low-dose)                                          | NR                              | NR                      | 5                                             |
| ECOG 1690 <sup>15</sup>                          | IFN alfa-2b (low-dose)                                          | NR                              | NR                      | NR                                            |
|                                                  | IFN alfa-2b (high-dose)                                         | NR                              | NR                      | NR                                            |
|                                                  | Observation                                                     | NR                              | NR                      | NR                                            |
| ECOG 1684 <sup>16</sup>                          | IFN alfa-2b (High-dose)                                         | (67)                            | NR                      | NR                                            |
|                                                  | Observation                                                     | NR                              | NR                      | NR                                            |
| EORTC 18871 <sup>17</sup>                        | rIFN alfa-2b                                                    | NR                              | NR                      | 11                                            |
|                                                  | Observation                                                     | NR                              | NR                      | 0                                             |
| COMBI-AD <sup>11,29</sup>                        | Dabrafenib +Trametinib                                          | 180 (41)                        | NR                      | 114                                           |
|                                                  | Placebo                                                         | 61 (14)                         | NR                      | 12 (3)                                        |
| Stadler et al. 2006 <sup>18</sup>                | Dacarbazine + natural human IFN alfa                            | NR                              | NR                      | 7                                             |
|                                                  | Observation                                                     | NR                              | NR                      | 0                                             |
| E1609 <sup>19</sup>                              | Ipilimumab (High-Dose)                                          | (65.4)                          | NR                      | (53.7)                                        |
|                                                  | Ipilimumab (Low-Dose)                                           | (53.3)                          | NR                      | (34.9)                                        |
|                                                  | IFN alfa-2b (High-dose)                                         | NR                              | NR                      | NR                                            |
| CheckMate 238 <sup>20,21</sup>                   | Nivolumab                                                       | 115 (25.4)                      | 177                     | 44                                            |
|                                                  | Ipilimumab                                                      | 250 (55.2)                      | 331                     | 193                                           |
| Trials excluded from final network meta-analyses |                                                                 |                                 |                         |                                               |

| Trial ID                             | Intervention                         | Grade 3/4 adverse events, n (%) | Discontinuations, n (%) | Discontinuations due to adverse events, n (%) |
|--------------------------------------|--------------------------------------|---------------------------------|-------------------------|-----------------------------------------------|
| Eigentler 2016 (DeCOG) <sup>22</sup> | PEG IFN alfa-2a                      | NR                              | 260                     | 118                                           |
|                                      | IFN alfa-2a (low-dose)               | NR                              | 235                     | 61                                            |
| EADO study <sup>23</sup>             | PEG IFN alfa-2b                      | (47.3)                          | 235                     | 122                                           |
|                                      | IFN alfa-2b (low-dose)               | (25.2)                          | 136                     | 58                                            |
| Lian et al. 2013 <sup>24</sup>       | IFN alfa-2b (high-dose)              | NR                              | 1                       | 1                                             |
|                                      | Chemotherapy                         | NR                              | NR                      | NR                                            |
|                                      | Observation                          | NR                              | 2                       | 2                                             |
| Sunbelt Melanoma Trial <sup>25</sup> | IFN alfa-2b (high-dose)              | NR                              | NR                      | NR                                            |
|                                      | Observation                          | NR                              | NR                      | NR                                            |
| MM-ADJ-5 <sup>26</sup>               | IFN alfa-2b (high-dose)              | NR                              | NR                      | 46                                            |
|                                      | IFN alfa-2b (Intermittent high-dose) | NR                              | NR                      | 21                                            |
| Tobin et al. 2018 <sup>27</sup>      | Ipilimumab                           | 2 (33)                          | NR                      | NR                                            |
|                                      | Ipilimumab and ATRA                  | 3 (75)                          | NR                      | NR                                            |
| Wang et al. 2015 <sup>28</sup>       | IFN alfa-2b (High-dose)              | NR                              | NR                      | 5                                             |
|                                      | Observation                          | NR                              | NR                      | NR                                            |

BSC: best supportive care; NR: not reported.

## References

1. Agarwala SS, Lee SJ, Yip W, Rao UN, Tarhini AA, Cohen GI, et al. Phase III randomized study of 4 weeks of high-dose interferon- $\alpha$ -2b in stage T2bNO, T3a-bNO, T4a-bNO, and T1-4N1a-2a (microscopic) melanoma: a trial of the Eastern Cooperative Oncology Group–American College of Radiology Imaging Network Cancer Research Group (E1697). *J Clin Oncol*. 2017;35:885–92. doi: 10.1200/JCO.2016.70.2951.
2. Cameron DA, Cornbleet MC, Mackie RM, Hunter JA, Gore M, Hancock B, et al; Scottish Melanoma Group. Adjuvant interferon alpha 2b in high risk melanoma — the Scottish study. *Br J Cancer*. 2001;84:1146–9.
3. Cascinelli N, Belli F, MacKie RM, Santinami M, Bufalino R, Morabito A. Effect of long-term adjuvant therapy with interferon alpha-2a in patients with regional node metastases from cutaneous melanoma: a randomised trial. *Lancet*. 2001;358:866–9.
4. Eggermont AM, Chiarion-Sileni V, Grob JJ, Dummer R, Wolchok JD, Schmidt H, et al. Adjuvant ipilimumab versus placebo after complete resection of high-risk stage III melanoma (EORTC 18071): a randomised, double-blind, phase 3 trial. *Lancet Oncol*. 2015;16:522–30. doi: 10.1016/S1470-2045(15)70122-1.
5. Eggermont AM, Suci S, MacKie R, Ruka W, Testori A, Kruit W, et al; EORTC Melanoma Group. Post-surgery adjuvant therapy with intermediate doses of interferon alfa 2b versus observation in patients with stage IIb/III melanoma (EORTC 18952): randomised controlled trial. *Lancet*. 2005;366:1189–96.

6. Eggermont AM, Suci S, Santinami M, Testori A, Kruit WH, Marsden J, et al; EORTC Melanoma Group. Adjuvant therapy with pegylated interferon alfa-2b versus observation alone in resected stage III melanoma: final results of EORTC 18991, a randomised phase III trial. *Lancet*. 2008;372:117–26. doi: 10.1016/S0140-6736(08)61033-8.
7. European Medicines Agency. Keytruda: European Public Assessment Report (EPAR) - Product Information. 2019. [https://www.ema.europa.eu/en/documents/product-information/keytruda-epar-product-information\\_en.pdf](https://www.ema.europa.eu/en/documents/product-information/keytruda-epar-product-information_en.pdf). Accessed 30 Sept 2019.
8. Eggermont AMM, Blank CU, Mandala M, Long GV, Atkinson V, Dalle S, et al. Adjuvant pembrolizumab versus placebo in resected stage III melanoma. *N Engl J Med*. 2018;378:1789–801.
9. Flaherty LE, Othus M, Atkins MB, Tuthill RJ, Thompson JA, Vetto JT, et al. Southwest Oncology Group S0008: a phase III trial of high-dose interferon alfa-2b versus cisplatin, vinblastine, and dacarbazine, plus interleukin-2 and interferon in patients with high-risk melanoma—an intergroup study of Cancer and Leukemia Group B, Children's Oncology Group, Eastern Cooperative Oncology Group, and Southwest Oncology Group. *J Clin Oncol*. 2014;32:3771–8. doi: 10.1200/JCO.2013.53.1590.
10. Garbe C, Radny P, Linse R, Dummer R, Gutzmer R, Ulrich J, et al. Adjuvant low-dose interferon  $\alpha$ 2a with or without dacarbazine compared with surgery alone: a prospective-randomized phase III DeCOG trial in melanoma patients with regional lymph node metastasis. *Ann Oncol*. 2008;19:1195–201. doi: 10.1093/annonc/mdn001.
11. Long GV, Hauschild A, Santinami M, Atkinson V, Mandalà M, Chiarion-Sileni V, et al. Adjuvant dabrafenib plus trametinib in stage III BRAF-mutated melanoma. *N Engl J Med*. 2017;377:1813–23. doi: 10.1056/NEJMoa1708539.

12. Hancock BW, Wheatley K, Harris S, Ives N, Harrison G, Horsman JM, et al. Adjuvant interferon in high-risk melanoma: the AIM HIGH Study—United Kingdom Coordinating Committee on Cancer Research randomized study of adjuvant low-dose extended-duration interferon alfa-2a in high-risk resected malignant melanoma. *J Clin Oncol*. 2004;22:53–61.
13. Hansson J, Aamdal S, Bastholt L, Brandberg Y, Hernberg M, Nilsson B, et al; Nordic Melanoma Cooperative Group. Two different durations of adjuvant therapy with intermediate-dose interferon alfa-2b in patients with high-risk melanoma (Nordic IFN trial): a randomised phase 3 trial. *Lancet Oncol*. 2011;12:144–52. doi: 10.1016/S1470-2045(10)70288-6.
14. Kim KB, Legha SS, Gonzalez R, Anderson CM, Johnson MM, Liu P, et al. A randomized phase III trial of biochemotherapy versus interferon-alpha- 2b for adjuvant therapy in patients at high risk for melanoma recurrence. *Melanoma Res*. 2009;19:42–9. doi: 10.1097/CMR.0b013e328314b84a.
15. Kirkwood JM, Ibrahim JG, Sondak VK, Richards J, Flaherty LE, Ernstoff MS, et al. High- and low-dose interferon alfa-2b in high-risk melanoma: first analysis of intergroup trial E1690/S9111/C9190. *J Clin Oncol*. 2000;18:2444–58.
16. Kirkwood JM, Strawderman MH, Ernstoff MS, Smith TJ, Borden EC, Blum RH. Interferon alfa-2b adjuvant therapy of high-risk resected cutaneous melanoma: the Eastern Cooperative Oncology Group Trial EST 1684. *J Clin Oncol*. 1996;14:7–17.
17. Kleeberg UR, Suci S, Bröcker EB, Ruitter DJ, Chartier C, Lienard D, et al; EORTC Melanoma Group in cooperation with the German Cancer Society (DKG). Final results of the EORTC 18871/DKG 80-1 randomised phase III trial: rIFN-alpha2b versus rIFN-gamma versus ISCADOR M versus observation after surgery in melanoma patients with either high-risk primary (thickness >3 mm) or regional lymph node metastasis. *Eur J Cancer*. 2004;40:390–402.



18. Stadler R, Luger T, Bieber T, Köhler U, Linse R, Technau K, et al. Long-term survival benefit after adjuvant treatment of cutaneous melanoma with dacarbazine and low dose natural interferon alpha: a controlled, randomised multicentre trial. *Acta Oncol.* 2006;45:389–99.
19. Tarhini AA, Lee SJ, Hodi FS, Rao UNM, Cohen GI, Hamid O, et al. A phase III randomized study of adjuvant ipilimumab (3 or 10 mg/kg) versus high-dose interferon alfa-2b for resected high-risk melanoma (U.S. Intergroup E1609): preliminary safety and efficacy of the ipilimumab arms. *J Clin Oncol.* 2017;35(Suppl). Abstract 9500. doi: 10.1200/JCO.2017.35.15\_suppl.9500.
20. Weber J, Mandala M, Del Vecchio M, Gogas HJ, Arance AM, Cowey CL, et al. Adjuvant nivolumab versus ipilimumab in resected stage III or IV melanoma. *N Engl J Med.* 2017;377:1824–35. doi: 10.1056/NEJMoa1709030.
21. Weber J, Del Vecchio M, Mandala M, Gogas HJ, Arance AM, Dalle S, et al. Adjuvant nivolumab versus ipilimumab in resected stage III/IV melanoma: 3-year efficacy and biomarker results from the phase 3 CheckMate 238 trial. Presented at ESMO 2019; 27 Sept–1 Oct 2019; Barcelona, Spain.
22. Eigentler TK, Gutzmer R, Hauschild A, Heinzerling L, Schadendorf D, Nashan D, et al; Dermatologic Cooperative Oncology Group (DeCOG). Adjuvant treatment with pegylated interferon  $\alpha$ -2a versus low-dose interferon  $\alpha$ -2a in patients with high-risk melanoma: a randomized phase III DeCOG trial. *Ann Oncol.* 2016;27:1625–32. doi: 10.1093/annonc/mdw225.
23. Grob JJ, Jouary T, Dréno B, Asselineau J, Gutzmer R, Hauschild A, et al. Adjuvant therapy with pegylated interferon alfa-2b (36 months) versus low-dose interferon alfa-2b (18 months) in melanoma patients without macrometastatic nodes: an open-label,

- randomised, phase 3 European Association for Dermato-Oncology (EADO) study. *Eur J Cancer*. 2013;49:166–74. doi: 10.1016/j.ejca.2012.07.018.
24. Lian B, Si L, Cui C, Chi Z, Sheng X, Mao L, et al. Phase II randomized trial comparing high-dose IFN- $\alpha$ 2b with temozolomide plus cisplatin as systemic adjuvant therapy for resected mucosal melanoma. *Clin Cancer Res*. 2013;19:4488–98. doi: 10.1158/1078-0432.CCR-13-0739.
25. McMasters KM, Egger ME, Edwards MJ, Ross MI, Reintgen DS, Noyes RD, et al. Final Results of the Sunbelt Melanoma Trial: a multi-institutional prospective randomized phase III study evaluating the role of adjuvant high-dose interferon alfa-2b and completion lymph node dissection for patients staged by sentinel lymph node biopsy. *J Clin Oncol*. 2016;34:1079–86. doi: 10.1200/JCO.2015.63.3776.
26. Mohr P, Hauschild A, Trefzer U, Enk A, Tilgen W, Loquai C, et al. Intermittent high-dose intravenous interferon alfa-2b for adjuvant treatment of stage III melanoma: final analysis of a randomized phase III Dermatologic Cooperative Oncology Group Trial. *J Clin Oncol*. 2015;33:4077–84. doi: 10.1200/JCO.2014.59.6932.
27. Tobin RP, Jordan KR, Robinson WA, Davis D, Borges VF, Gonzalez R, et al. Targeting myeloid-derived suppressor cells using all-trans retinoic acid in melanoma patients treated with Ipilimumab. *Int Immunopharmacol*. 2018;63:282–91. doi: 10.1016/j.intimp.2018.08.007.
28. Wang X, Mao LL, Si L, Chi Z, Cui C, Nan X, et al. Efficacy of high-dose adjuvant interferon therapy in high-risk melanoma harboring gene mutations. *J Clin Oncol*. 2015;33(Suppl). Abstract 9047. doi: 10.1200/jco.2015.33.15\_suppl.9047.

29. Hauschild A, Dummer R, Schadendorf D, Santinami M, Atkinson V, Mandalà M, et al. Longer follow-up confirms relapse-free survival benefit with adjuvant dabrafenib plus trametinib in patients with resected *BRAF* V600-mutant stage III melanoma. *J Clin Oncol*. 2018;36:3441–9. doi: 10.1200/JCO.18.01219.
