# Supplementary material for: Comparative efficacy and safety of adjuvant nivolumab versus other treatments in adults with resected melanoma: a systematic literature review and network meta-analysis
Source: PubMed Central journal article supplement (PMC7784366; doi:10.1186/s12885-020-07538-1), 2021-01-05
Supplement: 12885_2020_7538_MOESM3_ESM.pdf [file 12885_2020_7538_MOESM3_ESM.pdf]

## Appendix C: Results of the stage III/IV subgroup analyses

**Table C.1**

Constant hazard ratio estimates<sup>a</sup> from a fixed-effects network meta-analysis of recurrence-free/disease-free survival in patients with resected stage III/IV melanoma.

|                             |                             |                             |                             |                             |                             |                             |                             |
|-----------------------------|-----------------------------|-----------------------------|-----------------------------|-----------------------------|-----------------------------|-----------------------------|-----------------------------|
| Observation or placebo      | <b>1.94</b><br>(1.50, 2.49) | <b>2.04</b><br>(1.68, 2.48) | <b>1.79</b><br>(1.46, 2.19) | <b>1.32</b><br>(1.11, 1.55) | 1.31<br>(1.00, 1.72)        | 1.15<br>(0.95, 1.40)        | <b>1.11</b><br>(1.01, 1.22) |
| <b>0.52</b><br>(0.40, 0.67) | Nivolumab                   | 1.06<br>(0.77, 1.46)        | 0.92<br>(0.67, 1.28)        | <b>0.68</b><br>(0.56, 0.82) | <b>0.68</b><br>(0.51, 0.90) | <b>0.60</b><br>(0.43, 0.82) | <b>0.57</b><br>(0.44, 0.75) |
| <b>0.49</b><br>(0.40, 0.60) | 0.95<br>(0.69, 1.30)        | Dabrafenib + trametinib     | 0.87<br>(0.66, 1.16)        | <b>0.65</b><br>(0.50, 0.83) | <b>0.64</b><br>(0.46, 0.90) | <b>0.56</b><br>(0.43, 0.75) | <b>0.54</b><br>(0.44, 0.68) |
| <b>0.56</b><br>(0.46, 0.69) | 1.08<br>(0.78, 1.50)        | 1.15<br>(0.86, 1.51)        | Pembrolizumab               | <b>0.74</b><br>(0.57, 0.96) | 0.74<br>(0.53, 1.04)        | <b>0.65</b><br>(0.49, 0.86) | <b>0.62</b><br>(0.50, 0.78) |
| <b>0.76</b><br>(0.65, 0.90) | <b>1.47</b><br>(1.22, 1.78) | <b>1.55</b><br>(1.21, 2.00) | <b>1.36</b><br>(1.04, 1.76) | Ipilimumab 10 mg/kg         | 1.00<br>(0.81, 1.24)        | 0.88<br>(0.67, 1.14)        | 0.84<br>(0.70, 1.03)        |
| 0.76<br>(0.58, 1.00)        | <b>1.47</b><br>(1.11, 1.96) | <b>1.55</b><br>(1.11, 2.17) | 1.36<br>(0.96, 1.90)        | 1.00<br>(0.81, 1.24)        | Ipilimumab 3 mg/kg          | 0.88<br>(0.63, 1.24)        | 0.84<br>(0.63, 1.13)        |
| 0.87<br>(0.72, 1.05)        | <b>1.68</b><br>(1.22, 2.31) | <b>1.77</b><br>(1.34, 2.33) | <b>1.55</b><br>(1.16, 2.06) | 1.14<br>(0.88, 1.48)        | 1.14<br>(0.81, 1.60)        | Other chemotherapy          | 0.96<br>(0.80, 1.15)        |
| <b>0.90</b><br>(0.82, 0.99) | <b>1.74</b><br>(1.33, 2.28) | <b>1.84</b><br>(1.48, 2.28) | <b>1.61</b><br>(1.28, 2.02) | 1.19<br>(0.97, 1.44)        | 1.19<br>(0.88, 1.59)        | 1.04<br>(0.87, 1.25)        | IFN pooled                  |

<sup>a</sup>The value in each cell represents the hazard ratio (95% credible interval) for the comparison of the treatment indicated in that row versus the treatment indicated in that column; bolded values are statistically significant at the 0.05 significance level.

IFN: interferon.

**Table C.2**

Constant hazard ratio estimates<sup>a</sup> from a fixed-effects network meta-analysis of distant metastasis-free survival in patients with stage III/IV melanoma.

|                             |                             |                             |                             |                             |
|-----------------------------|-----------------------------|-----------------------------|-----------------------------|-----------------------------|
| Observation or placebo      | <b>1.69</b><br>(1.26, 2.24) | <b>1.89</b><br>(1.49, 2.37) | <b>1.32</b><br>(1.11, 1.56) | 1.06<br>(0.94, 1.20)        |
| <b>0.59</b><br>(0.45, 0.79) | Nivolumab                   | 1.12<br>(0.77, 1.62)        | <b>0.78</b><br>(0.62, 0.98) | <b>0.63</b><br>(0.46, 0.86) |
| <b>0.53</b><br>(0.42, 0.67) | 0.90<br>(0.62, 1.29)        | Dabrafenib + trametinib     | <b>0.70</b><br>(0.52, 0.94) | <b>0.56</b><br>(0.43, 0.73) |
| <b>0.76</b><br>(0.64, 0.90) | <b>1.28</b><br>(1.02, 1.61) | <b>1.43</b><br>(1.07, 1.91) | Ipilimumab 10 mg/kg         | 0.81<br>(0.65, 1.00)        |
| 0.94<br>(0.83, 1.06)        | <b>1.60</b><br>(1.16, 2.17) | <b>1.78</b><br>(1.36, 2.31) | 1.24<br>(1.00, 1.53)        | IFN pooled                  |

<sup>a</sup>The value in each cell represents the hazard ratio (95% credible interval) for the comparison of the treatment indicated in that row versus the treatment indicated in that column; bolded values are statistically significant at the 0.05 significance level.

IFN: interferon.
