# Supplementary material for: Comparative efficacy and safety of adjuvant nivolumab versus other treatments in adults with resected melanoma: a systematic literature review and network meta-analysis
Source: PubMed Central journal article supplement (PMC7784366; doi:10.1186/s12885-020-07538-1), 2021-01-05
Supplement: 12885_2020_7538_MOESM4_ESM.pdf [file 12885_2020_7538_MOESM4_ESM.pdf]

## Appendix D: Safety analyses

Figure D.1

Network diagrams of randomized controlled trials for subgroup analysis of safety outcomes

**A. Stage II/III/IV population – grade 3/4 adverse events**

**B. Stage II/III/IV population – discontinuations due to adverse events**

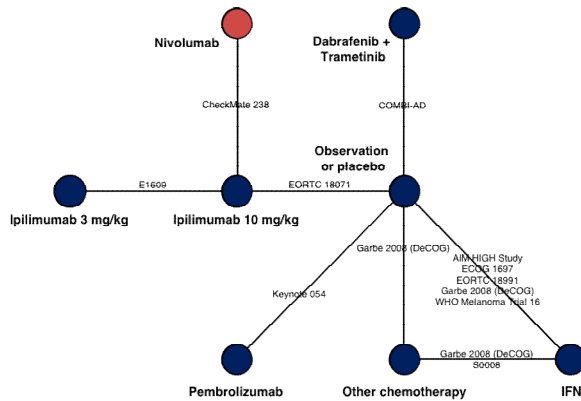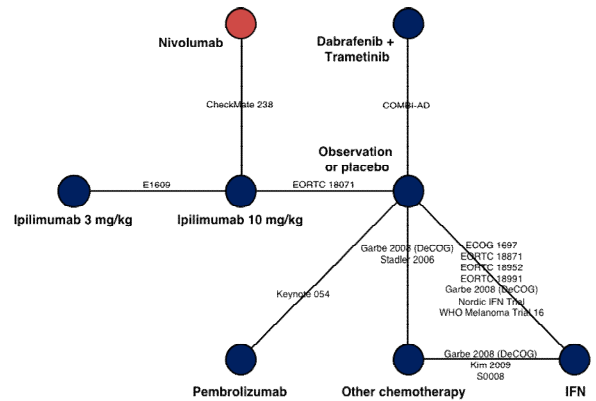

**C. Stage III/IV subgroup population – discontinuations**

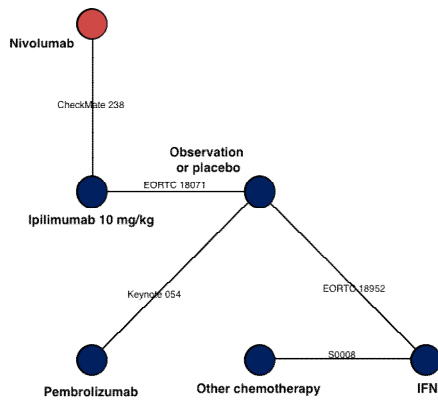

Notes: Trial names in red font indicate stage III subgroup data was used to inform comparison; other chemotherapy includes various combinations of cisplatin, vinblastine, dacarbazine, interleukin-2, temozolomide, and IFN-alfa-2b. IFN: interferon.

**Table D.1**

Odds ratio estimates<sup>a</sup> from a fixed-effects network meta-analysis of grade 3/4 adverse events in patients with stage II-IV melanoma.

|                                       |                                       |                                    |                                     |                                      |                                    |                                    |                                      |
|---------------------------------------|---------------------------------------|------------------------------------|-------------------------------------|--------------------------------------|------------------------------------|------------------------------------|--------------------------------------|
| Observation or placebo                | 1.08<br>(0.73, 1.60)                  | <b>0.23</b><br><b>(0.16, 0.32)</b> | <b>0.30</b><br><b>(0.23, 0.39)</b>  | <b>0.50</b><br><b>(0.34, 0.72)</b>   | <b>0.05</b><br><b>(0.03, 0.08)</b> | <b>0.09</b><br><b>(0.07, 0.11)</b> | <b>0.49</b><br><b>(0.37, 0.66)</b>   |
| 0.92<br>(0.63, 1.37)                  | Nivolumab                             | <b>0.21</b><br><b>(0.13, 0.36)</b> | <b>0.28</b><br><b>(0.21, 0.36)</b>  | <b>0.46</b><br><b>(0.32, 0.66)</b>   | <b>0.05</b><br><b>(0.03, 0.08)</b> | <b>0.08</b><br><b>(0.05, 0.13)</b> | <b>0.45</b><br><b>(0.28, 0.74)</b>   |
| <b>4.32</b><br><b>(3.12, 6.06)</b>    | <b>4.68</b><br><b>(2.79, 7.86)</b>    | Dabrafenib + trametinib            | 1.30<br>(0.84, 1.99)                | <b>2.15</b><br><b>(1.31, 3.54)</b>   | <b>0.21</b><br><b>(0.12, 0.37)</b> | <b>0.40</b><br><b>(0.27, 0.59)</b> | <b>2.13</b><br><b>(1.37, 3.30)</b>   |
| <b>3.34</b><br><b>(2.55, 4.41)</b>    | <b>3.62</b><br><b>(2.74, 4.79)</b>    | 0.77<br>(0.50, 1.18)               | Ipilimumab 10 mg/kg                 | <b>1.66</b><br><b>(1.29, 2.13)</b>   | <b>0.16</b><br><b>(0.10, 0.27)</b> | <b>0.31</b><br><b>(0.22, 0.43)</b> | <b>1.64</b><br><b>(1.10, 2.46)</b>   |
| <b>2.01</b><br><b>(1.40, 2.92)</b>    | <b>2.18</b><br><b>(1.50, 3.17)</b>    | <b>0.47</b><br><b>(0.28, 0.76)</b> | <b>0.60</b><br><b>(0.47, 0.77)</b>  | Ipilimumab 3 mg/kg                   | <b>0.10</b><br><b>(0.06, 0.17)</b> | <b>0.18</b><br><b>(0.12, 0.28)</b> | 0.99<br>(0.62, 1.59)                 |
| <b>20.46</b><br><b>(13.30, 31.55)</b> | <b>22.15</b><br><b>(12.44, 39.52)</b> | <b>4.73</b><br><b>(2.72, 8.13)</b> | <b>6.12</b><br><b>(3.69, 10.18)</b> | <b>10.16</b><br><b>(5.74, 17.93)</b> | Other chemotherapy                 | <b>1.88</b><br><b>(1.28, 2.75)</b> | <b>10.05</b><br><b>(5.97, 17.04)</b> |
| <b>10.91</b><br><b>(8.90, 13.40)</b>  | <b>11.81</b><br><b>(7.61, 18.32)</b>  | <b>2.52</b><br><b>(1.70, 3.69)</b> | <b>3.26</b><br><b>(2.33, 4.57)</b>  | <b>5.41</b><br><b>(3.56, 8.23)</b>   | <b>0.53</b><br><b>(0.36, 0.78)</b> | IFN                                | <b>5.36</b><br><b>(3.75, 7.66)</b>   |
| <b>2.03</b><br><b>(1.52, 2.73)</b>    | <b>2.20</b><br><b>(1.34, 3.59)</b>    | <b>0.47</b><br><b>(0.30, 0.73)</b> | <b>0.61</b><br><b>(0.41, 0.91)</b>  | 1.01<br>(0.63, 1.62)                 | <b>0.10</b><br><b>(0.06, 0.17)</b> | <b>0.19</b><br><b>(0.13, 0.27)</b> | Pembrolizumab                        |

<sup>a</sup>The value in each cell represents the hazard ratio (95% credible interval) for the comparison of the treatment indicated in that row versus the treatment indicated in that column; bolded values are statistically significant at the 0.05 significance level.

IFN: interferon.

**Table D.2**

Odds ratio estimates<sup>a</sup> from a fixed-effects network meta-analysis of discontinuations due to adverse events in patients with stage II-IV melanoma.

|                                |                              |                             |                             |                             |                             |                             |                             |
|--------------------------------|------------------------------|-----------------------------|-----------------------------|-----------------------------|-----------------------------|-----------------------------|-----------------------------|
| Observation or placebo         | <b>0.28</b><br>(0.15, 0.51)  | <b>0.08</b><br>(0.04, 0.14) | <b>0.04</b><br>(0.02, 0.07) | <b>0.09</b><br>(0.05, 0.15) | <b>0.07</b><br>(0.04, 0.10) | <b>0.04</b><br>(0.03, 0.06) | <b>0.14</b><br>(0.07, 0.25) |
| <b>3.52</b><br>(1.95, 6.48)    | Nivolumab                    | <b>0.28</b><br>(0.11, 0.65) | <b>0.14</b><br>(0.10, 0.21) | <b>0.31</b><br>(0.20, 0.49) | <b>0.23</b><br>(0.11, 0.49) | <b>0.15</b><br>(0.08, 0.30) | 0.48<br>(0.19, 1.15)        |
| <b>12.65</b><br>(7.16, 24.76)  | <b>3.62</b><br>(1.53, 8.82)  | Dabrafenib + trametinib     | 0.52<br>(0.24, 1.18)        | 1.12<br>(0.50, 2.67)        | 0.83<br>(0.39, 1.83)        | 0.55<br>(0.29, 1.12)        | 1.72<br>(0.70, 4.26)        |
| <b>24.49</b><br>(15.38, 40.49) | <b>6.96</b><br>(4.86, 10.08) | 1.93<br>(0.85, 4.15)        | Ipilimumab 10 mg/kg         | <b>2.17</b><br>(1.68, 2.80) | 1.60<br>(0.85, 3.09)        | 1.06<br>(0.62, 1.86)        | <b>3.31</b><br>(1.45, 7.41) |
| <b>11.25</b><br>(6.65, 19.84)  | <b>3.21</b><br>(2.06, 4.97)  | 0.89<br>(0.37, 2.00)        | <b>0.46</b><br>(0.36, 0.59) | Ipilimumab 3 mg/kg          | 0.74<br>(0.37, 1.49)        | <b>0.49</b><br>(0.27, 0.90) | 1.52<br>(0.65, 3.55)        |
| <b>15.38</b><br>(9.78, 23.67)  | <b>4.36</b><br>(2.04, 9.08)  | 1.20<br>(0.55, 2.54)        | 0.63<br>(0.32, 1.18)        | 1.36<br>(0.67, 2.70)        | Other chemotherapy          | <b>0.66</b><br>(0.45, 0.96) | 2.08<br>(0.89, 4.50)        |
| <b>23.25</b><br>(17.61, 29.80) | <b>6.57</b><br>(3.36, 12.56) | 1.83<br>(0.89, 3.47)        | 0.94<br>(0.54, 1.61)        | <b>2.05</b><br>(1.11, 3.69) | <b>1.51</b><br>(1.04, 2.21) | IFN pooled                  | <b>3.15</b><br>(1.45, 6.20) |
| <b>7.37</b><br>(3.95, 14.93)   | 2.10<br>(0.87, 5.15)         | 0.58<br>(0.23, 1.44)        | <b>0.30</b><br>(0.14, 0.69) | 0.66<br>(0.28, 1.55)        | 0.48<br>(0.22, 1.12)        | <b>0.32</b><br>(0.16, 0.69) | Pembrolizumab               |

<sup>a</sup>The value in each cell represents the hazard ratio (95% credible interval) for the comparison of the treatment indicated in that row versus the treatment indicated in that column; bolded values are statistically significant at the 0.05 significance level.

IFN: interferon.

**Table D.3**

Odds ratio estimates<sup>a</sup> from a fixed-effects network meta-analysis of discontinuation in patients with stage II-IV melanoma.

|                                    |                                    |                                    |                                     |                                    |                                    |
|------------------------------------|------------------------------------|------------------------------------|-------------------------------------|------------------------------------|------------------------------------|
| Observation or placebo             | 1.46<br>(0.82, 2.56)               | <b>0.35</b><br><b>(0.21, 0.56)</b> | 1.79<br>(0.92, 3.58)                | <b>0.32</b><br><b>(0.20, 0.53)</b> | 0.97<br>(0.76, 1.25)               |
| 0.68<br>(0.39, 1.22)               | Nivolumab                          | <b>0.24</b><br><b>(0.18, 0.31)</b> | 1.23<br>(0.52, 3.01)                | <b>0.22</b><br><b>(0.11, 0.48)</b> | 0.67<br>(0.36, 1.25)               |
| <b>2.89</b><br><b>(1.78, 4.84)</b> | <b>4.23</b><br><b>(3.20, 5.61)</b> | Ipilimumab 10 mg/kg                | <b>5.20</b><br><b>(2.29, 12.20)</b> | 0.93<br>(0.47, 1.92)               | <b>2.81</b><br><b>(1.64, 4.97)</b> |
| 0.56<br>(0.28, 1.09)               | 0.81<br>(0.33, 1.94)               | <b>0.19</b><br><b>(0.08, 0.44)</b> | Other chemotherapy                  | <b>0.18</b><br><b>(0.11, 0.29)</b> | 0.54<br>(0.26, 1.11)               |
| <b>3.11</b><br><b>(1.88, 5.08)</b> | <b>4.54</b><br><b>(2.08, 9.52)</b> | 1.07<br>(0.52, 2.11)               | <b>5.56</b><br><b>(3.51, 9.02)</b>  | IFN pooled                         | <b>3.02</b><br><b>(1.73, 5.22)</b> |
| 1.03<br>(0.80, 1.32)               | 1.50<br>(0.80, 2.77)               | <b>0.36</b><br><b>(0.20, 0.61)</b> | 1.84<br>(0.90, 3.82)                | <b>0.33</b><br><b>(0.19, 0.58)</b> | Pembrolizumab                      |

<sup>a</sup>The value in each cell represents the hazard ratio (95% credible interval) for the comparison of the treatment indicated in that row versus the treatment indicated in that column; bolded values are statistically significant at the 0.05 significance level.

IFN: interferon.
